# 1 **Size-dependent increase in RNA Polymerase II** 2 **initiation rates mediates gene expression** 3 **scaling with cell size**

4  
5 Xi-Ming Sun<sup>1,2\*</sup>, Anthony Bowman<sup>3\*</sup>, Miles Priestman<sup>1,2,3</sup>, Francois Bertaux<sup>1,2,3, §</sup>, Amalia  
6 Martinez-Segura<sup>1,2</sup>, Wenhao Tang<sup>3</sup>, Dirk Dormann<sup>1,2</sup>, Vahid Shahrezaei<sup>3,4</sup> & Samuel  
7 Marguerat<sup>1,2,4</sup>

8

9 <sup>1</sup> MRC London Institute of Medical Sciences (LMS), Du Cane Road, London W12 0NN, UK

10 <sup>2</sup> Institute of Clinical Sciences (ICS), Faculty of Medicine, Imperial College London, Du Cane Road,  
11 London W12 0NN, UK

12 <sup>3</sup> Department of Mathematics, Faculty of Natural Sciences, Imperial College London, London SW7  
13 2AZ, UK

14 <sup>4</sup> Correspondence to [v.shahrezaei@imperial.ac.uk](mailto:v.shahrezaei@imperial.ac.uk) or [samuel.marguerat@imperial.ac.uk](mailto:samuel.marguerat@imperial.ac.uk)

15 \* These authors contributed equally to this work.

16 § Present address: Institut Pasteur, 28 rue du Docteur Roux, 75015 Paris, France.

17

18

19 **ABSTRACT**

20 Cell size varies during the cell cycle and in response to external stimuli. This requires the  
21 tight coordination, or “scaling”, of mRNA and protein quantities with the cell volume in order  
22 to maintain biomolecules concentrations and cell density. Evidence in cell populations and  
23 single cells indicates that scaling relies on the coordination of mRNA transcription rates with  
24 cell size. Here we use a combination of single-molecule fluorescence *in situ* hybridisation  
25 (smFISH), time-lapse microscopy and mathematical modelling in single fission yeast cells to  
26 uncover the precise molecular mechanisms that control transcription rates scaling with cell  
27 size. Linear scaling of mRNA quantities is apparent in single fission yeast cells during a  
28 normal cell cycle. Transcription rates of both constitutive and regulated genes scale with cell  
29 size without evidence for transcriptional bursting. Modelling and experimental data indicate  
30 that scaling relies on the coordination of RNAPII transcription initiation rates with cell size  
31 and that RNAPII is a limiting factor. We show using real-time quantitative imaging that size  
32 increase is accompanied by a rapid concentration independent recruitment of RNAPII onto  
33 chromatin. Finally, we find that in multinucleated cells, scaling is set at the level of single  
34 nuclei and not the entire cell, making the nucleus the transcriptional scaling unit. Integrating  
35 our observations in a mechanistic model of RNAPII mediated transcription, we propose that  
36 scaling of gene expression with cell size is the consequence of competition between genes  
37 for limiting RNAPII.

38

39

## 40 INTRODUCTION

41 Gene expression is coordinated with cell size in order to maintain biomolecule  
42 concentrations. Understanding the mechanisms that mediate this coordination, called  
43 hereafter “scaling”, is a fundamental and intriguing problem in cell biology [1,2]. Messenger  
44 RNAs (mRNA) and proteins are synthesised from the cell DNA genome, which is one of the  
45 few cellular components that do not scale with size. Because cell volume increases  
46 exponentially and mRNA half-lives are typically short, constant rates of mRNA or protein  
47 production cannot lead to gene expression scaling. Recent work, in yeast [3], animal [4,5]  
48 and plant cells [6] has shown that mRNA synthesis rates instead are coordinated globally  
49 with cell size and are a major mechanism of scaling. Conversely, mRNA degradation seems  
50 to be mostly unconnected to scaling [3,4,6], although evidence suggests that degradation  
51 rates are adjusted early after budding yeast asymmetric division [7] and when growth rate  
52 changes [8,9]. Scaling is pervasive and only few mRNAs are able to deviate from its  
53 regulation [10–12]. Interestingly, two of them have been found to participate in the control of  
54 size homeostasis [10,11].

55 What could be the molecular mechanism behind transcription scaling with cell size? For a  
56 gene with an active promoter mRNA numbers follow a Poisson distribution [13].  
57 Transcription is however often discontinuous and periods of RNA synthesis or “bursts”  
58 alternate with periods of promoter inactivity [14]. Work in single mammalian cells has shown  
59 that scaling of mRNA numbers results from a coordination of the size of the transcription  
60 bursts with cell volume and not from their frequency [4]. This is compatible with the  
61 increased RNAPII occupancy observed genome-wide in large fission yeast cell cycle  
62 mutants [3]. This also indicates that the mechanism behind scaling may not be related to  
63 activation of transcription but rather to the efficiency of an active promoter. Critically,  
64 transcription is a complex process and is regulated at many levels including, RNAPII  
65 initiation, pause/release, elongation, and termination [15–18]. Which of these processes is  
66 coordinated with cell size to mediate scaling remains unclear.

67 How could a complex set of molecular reactions such as transcription become more efficient  
68 as cell size increases? In an elegant experiment Padovan-Merhar and colleagues fused cells  
69 of small and large size and found that the number of mRNAs from a gene encoded in the  
70 small cell genome would increase in response to the large cell environment, however its  
71 concentration was almost halved. This suggests that scaling responds to both cell volume  
72 and DNA content [4]. This is consistent with the observation that the cell synthesis capacity  
73 is split between genome copies in diploid budding yeast cells [10]. Importantly, changes in

74 gene numbers, in the case of increased ploidy for instance, are associated with overall cell  
75 size increase in many organisms [1]. This indicates that the number of genes present in a  
76 cell is linked to its volume and number of macromolecules. This also suggests that the cell's  
77 overall synthetic capacity could be limiting and have a determining role in setting its size  
78 [19]. It is therefore likely that scaling depends on a limiting factor involved in transcription but  
79 its identity and regulation with the cell volume is not known [19,20].

80 In this study, we measured gene expression in over 20,000 single cells of the fission yeast  
81 *Schizosaccharomyces pombe* by single molecule *in situ* hybridisation (smFISH, **Tables S1-**  
82 **3**) [21]. We combined these data with agent-based models of growing and dividing cells [22–  
83 24], stochastic models of gene expression [13,25,26] and Bayesian inference [27–33] to  
84 investigate the quantitative parameters of gene expression that mediate scaling. This  
85 integrative approach enabled us to determine which part of the transcription process is  
86 scaling with cell size and which molecular event connects transcription with the cell volume.

87

## 88 **RESULTS**

### 89 **Gene expression scaling is a single cell attribute of constitutive and inducible gene** 90 **expression.**

91 We first confirmed that scaling of gene expression with cell size was an attribute of single  
92 fission yeast cells during rapid proliferation. To do this, we measured mRNA levels of 7  
93 constitutively expressed genes in wild-type haploids (*wt*), and in conditional mutants of the  
94 *Wee1* (*wee1-50*) and *Cdc25* (*cdc25-22*) cell cycle regulators by smFISH (**Figure 1A, Table**  
95 **S1**). At semi-permissive temperature, mutant cells divide at smaller and larger sizes than *wt*  
96 respectively (**Figure S1A**) [3]. Consistent with population microarray data, mean numbers of  
97 the 7 mRNAs measured in single cells scale with the average size of the three strains  
98 (**Figure 1B**) [3].

99 We then wondered whether scaling could be detected as cells elongate and progress  
100 through a normal cell cycle. The fission yeast elongation phase is restricted to G2.  
101 Confounding effects arising from changes in genome content during DNA replication are  
102 therefore unlikely. Using cell length as a measure of size (**methods**), we analysed  
103 expression of the *rpb1* mRNA as a function of single cells' sizes in *wt*, mutant and diploid  
104 cells and observed linear scaling within each genotype across a wide range of sizes (**Figure**  
105 **1C and 1F**). Linear scaling during the cell cycle was apparent for all the constitutive genes  
106 analysed in this study (**Figure S1B-C**). This indicates that gene expression scaling is not an  
107 artefact of mutations in the *wee1* and *cdc25* cell-cycle regulators. Moreover, the mutant data



108 demonstrate that gene expression scales over a dynamic range of sizes larger than that  
109 observed in *wt* cells. Together with earlier studies in cell populations this analysis  
110 establishes fission yeast as a powerful model system for studying scaling [3].

111 We next analysed the relation of scaling with ploidy using diploid cells. Diploids follow  
112 scaling parameters (slope, intercept) similar to smaller haploids (**Figure 1C, 1F**).  
113 Interestingly, for a given size, mRNA numbers in diploids and in *cdc25-22* haploids were  
114 similar (**Figure S1D-F**). Moreover, when analysing 3 diploid strains bearing heterozygous  
115 deletions of single genes we observed significant linear scaling of the corresponding mRNA  
116 but decreased concentrations compared to both diploid and *cdc25-22* cells. This suggests  
117 that scaling of single gene copies in fission yeast is coordinated with the cell genome content  
118 and that the machinery behind scaling may be limiting (**Figure S1D-F**).

119 At the level of single genes, is scaling a property of constitutive expression or do genomes of  
120 larger cells have a globally higher gene expression potential? To answer this question, we  
121 analysed three mRNA that are induced during specific phases of the cell cycle (**Figure**  
122 **S1G**). All three mRNA showed stronger induction levels in larger cells when comparing *wt*  
123 with *wee1-50* and *cdc25-22* mutants (**Figure 1D, 1G, S1I and S1J**). This indicates that  
124 larger cells have an increased gene expression potential in order to support scaling of  
125 constitutive mRNA and inducible transcripts, which were not expressed in smaller cells at the  
126 beginning of the cycle.

127 To investigate this further, we analysed the induction of two genes, which respond to acute  
128 changes in external conditions. The uracil regulated gene *urg1* responds to changes in uracil  
129 concentration and *sib1* to addition of 2,2-dipyridyl (DIP) [34,35]. Induction of the *urg1* mRNA  
130 was heterogeneous and scaled with cell size across size mutants (**Figure 1E, 1H, and S1H**).  
131 The *sib1* mRNA showed a much more homogeneous response which also showed clear  
132 scaling within and across cell types (**Figure S1K**). This indicates that higher gene  
133 expression capacity in larger cells supports scaling in response to unexpected changes in  
134 external conditions. Taken together, these data indicate that scaling is universal and does  
135 not depend on the mode of gene regulation. Scaling does not result from a passive  
136 accumulation of mRNA during the cell cycle but from a change in the cell gene expression  
137 capacity that is coordinated with cell size.

138

### 139 **Coupling of mRNA decay rates with cell size is not a mechanism of scaling**

140 Messenger RNA quantities are regulated at the level of transcription but also post-  
141 transcriptionally through modulation of degradation rates [36]. Three studies have reported

142 that mRNA degradation rates are not regulated as a function of cell size in fission yeast,  
143 plant and mammalian cells [3,4,6]. To confirm these observations and extend them to single  
144 fission yeast cells, we analysed expression of 3 genes by smFISH after transcription  
145 inhibition with Thiolutin in *wt*, *wee1-50*, and *cdc25-22* cells. Thiolutin has been shown to  
146 inhibit transcription in *S. pombe* efficiently (**Figure S2A**) [11]. We observed mRNA half-lives  
147 of around 30-40min for the *rpb1* and *rpb2* mRNAs consistent with previous observations  
148 (**Figure S2B**) [37]. In *wee1-50* and *cdc25-22* mutants both mRNAs showed half-lives similar  
149 to *wt*, consistent with an absence of scaling of mRNA degradation rates. We also measured  
150 mRNA half-lives as a function of the cell cycle using cells binned by size. This analysis did  
151 not show consistent positive or negative coordination of degradation kinetics with cell size  
152 (**Figure S2B, left**). The absence of scaling of mRNA degradation rates was further  
153 confirmed using an orthogonal promoter switch-off approach for the *rpb1*, *rpb2* and *rtp1*  
154 genes (**Figure S2B, right**). Finally, as discussed in the next section mathematical modelling  
155 and inference do not support scaling of degradation rate. Overall, in agreement with previous  
156 studies, our analysis indicates that mRNA degradation is not a major mediator of scaling.

157

### 158 **Coupling of transcription rates to cell size and not burst frequency mediates scaling.**

159 We next explored the contribution of transcription rates to scaling using measurements of  
160 mRNA quantities and mathematical modelling. Using this combined approach allowed us to  
161 study dynamic transcription rates from static smFISH measurements of single cells. We  
162 developed agent-based models that incorporate the two-state model of gene expression  
163 inside growing and dividing cells, which are themselves described by phenomenological  
164 models of cell growth and size control (**Figure 2A, methods**). We used an Approximate  
165 Bayesian Computation (ABC) approach on cell size and smFISH measurements to infer  
166 mechanism of scaling. This inference approach determines the simplest model that captures  
167 the statistics of the experimental measurements and returns posteriors of the parameters  
168 and model probabilities for all models (**methods**). We used 2 classes of gene expression  
169 models that are the limiting cases of the two-state model shown in **Figure 2A**. The first class  
170 describes transcriptional bursts explicitly, while the second assumes only non-bursty  
171 transcription kinetics with a simple birth-death process that produces Poisson distributions  
172 (**Figure 2A**). Each class is in turn composed of two models the first assuming constant  
173 transcription rates during the cell cycle and the second assuming transcription rates that  
174 increase linearly (“scale”) with cell size (**methods**).

175 We performed model selection between these four models on the smFISH data for 7  
176 constitutively expressed genes in the *wt*. This analysis generated two clear conclusions.

177 First, models assuming bursty transcription were strongly penalised and supported by small  
178 model probabilities (**Figure 2B**, compare proportion of blue and red colours). Second,  
179 among the Poisson models, the one assuming transcription scaling with size was preferred  
180 for all but one mRNA (*rpb3* in **Figure 2B**, compare orange and dark red colours). From this  
181 we conclude that transcription rates of constitutively expressed genes in fission yeast are not  
182 bursty and scale with cell size.

183 We then asked whether transcription regulated by the cell cycle or by external cues followed  
184 the same paradigm. We found that, as constitutively expressed genes, cell-cycle regulated  
185 mRNAs do not follow a bursty transcription dynamics (**Figure 2B, middle**). This indicates  
186 that transcription, even when regulated in defined sections of the cell cycle falls into the  
187 Poisson regime. In terms of scaling, model selection is, as for the constitutive case, in overall  
188 support of scaling of transcription rate with cell size (**Figure 2B, middle**). Messenger RNAs  
189 that respond to external stimuli showed a different picture. Model selection favoured the  
190 bursty model with support for burst size scaling. This could point to bursty transcription of  
191 inducible genes, to the presence of strong extrinsic noise, or to a scenario where cells  
192 respond heterogeneously to the external signals.

193 In order to validate the model selection analysis, we generated simulations for all constitutive  
194 and cell-cycle regulated genes from **Figure 2B**, using models where transcription rates scale  
195 with cell size and follow a Poisson regime. This analysis reproduced quantitatively the mean  
196 and coefficient of variation (sd/mean, CV) of all experimental smFISH measurements, which  
197 illustrated the non-bursty nature of transcription for these genes further (**Figure 2C**). We  
198 then used the inferred parameters for the Poisson models to simulate gene expression of  
199 multiple genes in single cells and compared them to experimental data where 3 different  
200 mRNAs were measured in each cell (**methods**). This analysis suggests that most gene-to-  
201 gene correlations in expression are explained by scaling of transcription rates with cell size  
202 and may not require extensive additional regulation (**Figure 2D**). However, our data also  
203 suggest that for some gene pairs (e.g. Rpb1-Rpb2), correlations can be explained better by  
204 including some additional extrinsic variability.

205 We finally asked whether our modelling approach was also in support of a negligible role of  
206 mRNA degradation in scaling. We performed further model selection and simulation  
207 analyses on the transcription shut-off experiment from **Figure S2B** using models that  
208 consider different possible scalings of transcription and degradation rates (**methods**). This  
209 analysis shows that the model assuming transcriptional scaling with constant rates of mRNA  
210 degradation with cell size is overwhelmingly chosen (**Figure 2E**) and could capture  
211 experimental data quantitatively confirming our initial analysis (**Figure S2B**).

212 In summary, we show that, as in metazoans, scaling occurs through coordination of  
213 transcriptional rates with cell size in a rapidly growing unicellular organism. However, we find  
214 that transcription during the fission yeast rapid cell cycle is mainly Poissonian except during  
215 acute response to external changes where we detect signs of bursty expression. This is  
216 consistent with previous observation in the budding yeast *Saccharomyces cerevisiae* [38].  
217 Finally, we find that scaling of transcription rates explains most of the expression correlation  
218 of multiple mRNAs.

219

### 220 **Coordination of RNAPII initiation rates with cell size as the main mechanism of** 221 **scaling.**

222 We then wondered which specific aspect of the transcription process was directly  
223 coordinated with cell size to mediate scaling. To investigate this and to confirm model  
224 predictions from **Figure 2**, we measured transcription rates experimentally. Single cells'  
225 transcription rates can be estimated from smFISH images by measuring intensities of  
226 nuclear transcription sites [38]. As a model, we used probes directed against the 5' region of  
227 the *rbp1* mRNA. This probe design provides strong sensitivity for detection of nascent  
228 transcripts (**Figure S3A, S3B**). Transcription site intensities and cell size were overall  
229 positively correlated when comparing *wt*, *wee1-50* and *cdc25-22* cells confirming modelling  
230 results and previous observation in a metazoan cell line (**Figure 3A, 3B, S3C**) [4]. We then  
231 investigated the impact of increased ploidy on transcription rates scaling. For this we  
232 compared nascent site intensities of 4 mRNA in haploid cells with those of diploid strains.  
233 We used probes against the 5' end of *rpb1* as above and against three mRNA induced in  
234 specific phases of the cell cycle, since inducible expression increases the sensitivity of  
235 nascent site analysis. Intensities of individual transcription sites were similar between  
236 haploid and diploid cells (**Figure 3C**, green and yellow boxes). However, when considering  
237 the total intensity per cell, diploids showed increased rates and scaling was apparent again  
238 (**Figure 3C**, orange boxes). This indicates that the cell transcriptional capacity is limiting and  
239 distributed between the two gene copies of diploids. This was confirmed by analysis of the  
240 nascent intensity of the *rbp1* mRNA in a heterozygous deletion strain which showed no  
241 increased rates in the remaining copy (**Figure 3C**).

242 To investigate further the mechanism behind scaling of transcription rates, we designed an  
243 orthogonal modelling approach where transcription is modelled as RNAPII particles hopping  
244 on a gene represented by a lattice (**Figure 3D**). This approach, which is based on a totally  
245 asymmetric simple exclusion process (TASEP), has been used successfully to study  
246 transcription and translation [6,39–42]. In our model, a gene is represented by a lattice of

247 length  $L_G$  and non-bursty transcription is modelled using three rates: i) the transcription  
248 initiation rate  $\alpha$  is the rate at which RNAPII molecules enter the first site of the lattice (gene);  
249 ii) the elongation rate  $\beta$  is the rate at which RNAPII molecules hop one site forward on the  
250 lattice (gene); and iii) the termination rate  $\gamma$  is the rate at which the RNAPII molecule which  
251 sits on the last site of the gene leaves the lattice and produces a full length mRNA (**Figure**  
252 **3D**). We incorporated this model in the agent-based framework from **Figure 2** assuming  
253 each rate could be linearly coupled to cell size.

254 By sampling the rates  $\alpha, \beta$  and  $\gamma$  over physiological time scales estimated from previous  
255 studies (**Methods**) we found that coupling of initiation rates with size produced the most  
256 robust linear scaling (**Figure 3E**) and the strongest positive correlation of nascent intensities  
257 with size (**Figure S3D**). Although a model coupling transcription elongation rates with cell  
258 size could also generate linear scaling in some parameter regions (**Figure 3E, S3D**), these  
259 required elongation rates to be much slower than experimental measurements either in  
260 yeast or metazoans which report elongation rates of around 2kb/min (**Figure S3F**) [38,43–  
261 47]. Importantly, linear scaling could only be observed in regimes with slow initiation rates  
262 relative to elongation and termination indicating that initiation is rate limiting (**Figure S3E**).  
263 Interestingly, this also suggests that fast, non-limiting initiation rates could be a mechanism  
264 by which some genes escape scaling (e.g. *rpb3*; **Figure 2B**). Finally, these results were  
265 confirmed by ABC inference analysis of nascent sites intensities data using the same  
266 TASEP model for 3 genes in different strains which showed clear preference for the initiation  
267 model (**Figure S3G**). This *in silico* analysis indicates that scaling of initiation rates with cell  
268 size is the likely mechanism of scaling.

269 The initiation model generated two important predictions. First, the model predicts that, even  
270 for non-bursty genes, cells in a population are not all actively transcribing at all times and the  
271 frequency of active transcription should increase with cell size. To test this prediction, we  
272 compared the fraction of cells with a nascent transcription site (“active cell fraction”) in *wee1-*  
273 *50*, *wt*, *cdc15-22* and diploid cells. As predicted by the model, a clear increase in the fraction  
274 of transcriptionally active cells with size could be observed (**Figure 3F**). Moreover, a strong  
275 positive correlation of the active cells fraction with cell length was apparent when calculated  
276 in sliding windows of increasing cell numbers during the normal cell cycle (**Figure S3I**). The  
277 second prediction of the initiation scaling model is a strong positive correlation between the  
278 number of transcribing RNAPII and cell size (**Figure S3D**). To test this, we analysed RNAPII  
279 occupancy across the genomes of *wt*, *wee1-50* and *cdc25-22* cells by chromatin  
280 immunoprecipitation followed by next generation sequencing (ChIP-seq). We used three  
281 antibodies against total RNAPII and Serine 5 phosphorylation of its carboxy terminal domain

282 (CTD, **methods**). Using data normalised to occupancy at histone genes (**methods**) we  
283 could observe a significant increase in overall RNAPII occupancy with size consistent with  
284 previous observation and confirming model predictions (**Figure 3G**) [3]. Importantly, we did  
285 not find evidence for a redistribution of RNAPII from the 5' to the 3' of genes in larger cells  
286 which makes regulation of scaling at the level of RNAPII pause/release unlikely (**Figure 3H,**  
287 **S3J**). This profile was also reproduced quantitatively in our minimal TASEP model (**Figure**  
288 **3D**, data not shown). In summary, our *in silico* and experimental data indicate that  
289 transcriptional scaling is mediated by an increase in RNAPII initiation rates coordinated with  
290 cell size. In addition, our modelling data together with the increase in RNAPII occupancy  
291 observed in larger cells suggest that RNAPII could be a limiting factor for transcription as cell  
292 size increases.

293

#### 294 **RNAPII amounts on chromatin increases with cell size.**

295 If scaling of initiation rates is the mechanism behind scaling and RNAPII is limiting, the  
296 amount of RNAPII complexes on the genome of single cells should increase during the cell  
297 cycle. To test this hypothesis, we measured localisation of RNAPII in single cells by live-cell  
298 imaging. To do this, we tagged components of the RNAPII complex with green fluorescent  
299 protein (GFP) and imaged them during the cell cycle (**Figure 4A, S4A**). First, we observed  
300 that the cellular concentration of Rpb1 and Rpb9, two RNAPII subunits, remained constant  
301 during the fission yeast G2 growth phase (**Figure 4B, S4B**). This indicates that scaling of  
302 transcription initiation is not controlled by regulation of the cellular concentration RNAPII. Our  
303 image data show that a very large fraction of the tagged RNAPII subunits localises in the  
304 nucleus in the DAPI-positive area (**Figure 4A**). We therefore asked whether the amount of  
305 RNAPII on chromatin changes with cell size during the cell cycle. To assess this, we  
306 measured fluorescence intensities of the nuclear region occupied by RNAPII subunits  
307 (**Figure 4C, S4C**). Strikingly, the signal for both Rpb1 and Rpb9 increases steadily during  
308 fission yeast G2 phase where most cell size increase occurs (**Figure 4C, S4C**). Importantly  
309 this was not the case for another DNA bound protein the histone Hta2 (H2A beta), (**Figure.**  
310 **4D-E**). This is consistent with the prediction of the initiation scaling model in the previous  
311 section and indicates that RNAPII quantities are likely to be limiting for transcription. In  
312 summary, these experiments indicate that increased initiation rates that mediate scaling are  
313 sustained by efficient import of RNAPII in the nucleus together with rapid recruitment onto  
314 chromatin.

315

#### 316 **The nucleus is the scaling unit**



317 In fission yeast and other organisms, nuclear and cytoplasmic volume are intimately  
318 connected [48]. As scaling of initiation rates depends on RNAPII levels in the nucleus we  
319 wondered whether nuclear size rather than cell size itself could be the quantitative  
320 determinant of scaling.

321 To test this idea, we analysed nascent site intensities of *cdc11-119* mutant cells cultivated at  
322 non-permissive temperature. Under these conditions, cells elongate, undergo mitosis and  
323 nuclear division but do not divide (**Figure 5A**) [49]. Strikingly, scaling of nascent site  
324 intensities of individual nuclei with cell size was not apparent in this system ( $R_{\text{Pearson}} = 0.06$ ,  
325 **Figure 5B, right**). Scaling was only restored when all nascent sites present in a cell were  
326 added together ( $R_{\text{Pearson}} = 0.46$ , **Figure 5B, left**). This mirrors data from multinucleated cells  
327 showing that while the overall nuclear volume scales with cell volume, the volume of  
328 individual nuclei is proportional to their surrounding cytoplasmic volume [48]. Consistent  
329 with this, the ratios of nascent site intensities between nuclei of *cdc11-119* cells were weakly  
330 correlated with their immediate cytoplasmic volumes (**Figure S5A**). This indicates that the  
331 cell “scaling unit” could be the nucleus and not the whole cell.

332 We next analysed scaling in conditions where the correlation between cell and nuclear size  
333 is compromised. Pom1 is a regulator of cell polarity and division which when deleted leads to  
334 increased size variability at cell birth due to cell partitioning errors [50]. We analysed  
335 expression of three mRNA by smFISH in *pom1Δ* mutant cells expressing a marker of the  
336 nuclear envelope to allow measurement of nuclear size (**Figure 5C**). As expected cell and  
337 nuclear size show smaller correlation in the *pom1Δ* mutants compared to *wt* cells (**Figure**  
338 **S5B**). Scaling in this system was comparable to *wt* cells with the exception that *pom1Δ*  
339 mutants showed a higher y-axis intercept when mRNA numbers are plotted as a function of  
340 cell size (**Figure S5C**). This indicates that mRNA concentrations in *pom1Δ* cells are higher in  
341 smaller cells after birth and negatively correlated with cell size (**Figure 5D**). This deviation  
342 from perfect concentration homeostasis is also observed but to a lower degree in *wt* cells  
343 (**Figure 5D**) as reported for mammalian cells [4]. Moreover, mRNA numbers divided by  
344 nuclear volume show a negative correlation with nuclear volume (**Figure S5D**). The  
345 modelling approach described in **Figure 2** which is based on transcription scaling with cell  
346 size and binomial partitioning of mRNAs based on daughter cell sizes failed to capture this  
347 behaviour (**Figure 5E, magenta line**). However, a modified model coupling transcription  
348 rates to nuclear size instead produced a good fit to the data (**Figure 5E, S5F green line**).  
349 Together, this analysis suggests that beside the nucleus being the scaling unit, nuclear size  
350 could be an important determinant of scaling.

351

## 352 **A mechanistic model of scaling**

353 We used the results from this study to develop a mechanistic model of scaling centred  
354 around RNAPII mediated transcription (see also [19,20]). (**Figure 5F, methods**). In this  
355 model the rates of RNAPII complex synthesis and maturation scale with cell size. This is  
356 consistent with our smFISH and live-cell imaging data showing that RNAPII subunits have a  
357 constant cellular concentration during the cell cycle (**Figure 1 and 4**). RNAPII is then  
358 transported to the nucleus with a rapid rate that is depleting cytosolic RNAPII (as observed  
359 in live-cell imaging data; **Figure 4**). Once in the nucleus, RNAPII binds to DNA with a  
360 constant high affinity and transcription rates are proportional to the numbers of DNA-RNAPII  
361 complexes present on each gene at any given time consistent with scaling of initiation rates  
362 (**Figure 3**). Finally, RNAPII levels is set to be limiting in line with the initiation scaling model  
363 (**Figure 3**), the behaviour of diploid and heterozygous mutants (**Figure 3**) [10] and with the  
364 fact that the cell synthetic capacity is titrated against the number of genes in heterokaryons  
365 [4]. Moreover, this assumption fits the observation that many RNAPII subunits are limiting for  
366 growth in fission yeast [51–53]. The high affinity and the limiting amount of RNAPII ensures  
367 that the majority of RNAPII molecules are bound to DNA and increase with cell size  
368 consistent with our imaging data (**Figure 4**) and with biochemical evidence from mammalian  
369 cells [4]. Finally, DNA replication occurs close to cell division and each daughter cell inherits  
370 about half of the DNA-bound RNAPII mostly independent of its size as observed in our live  
371 cell imaging experiment (**Figure 4C, S4C**). This simple model is able to capture the different  
372 features of our data. First, it retrieved the scaling of DNA-bound RNAPII with cell size while  
373 keeping the overall cellular concentration constant as observed in **Figure 4 (Figure S5E)**.  
374 Second, it explained the scaling of mRNA numbers with cell size including the higher mRNA  
375 concentration observed in smaller cells (**Figure 5E**). As this mechanistic model relies on  
376 both cell size mediated production of RNAPII and nuclear mediated partitioning of RNAPII it  
377 captures better the negative correlation between mRNA numbers over nuclear area and cell  
378 size than a purely nuclear size mediated transcriptional scaling (**Figure S5E**, compare blue  
379 and green line). Overall, this simple mechanistic model of RNAPII transcription by  
380 integrating the experimental findings from this study, explains the origin of transcriptional  
381 scaling and its subtler features and identifies the competition between genes for the limited  
382 pool of transcriptional machinery as central to the phenomenon of transcriptional scaling.

383

## 384 **CONCLUSIONS**

385 We performed an extensive experimental and modelling study of gene expression scaling  
386 with cell size in single fission yeast cells. We found that scaling is a pervasive feature of



387 gene expression that impinges on constitutive and regulated expression. We then showed  
388 that scaling relies on an increase in RNAPII initiation rates with cell size and a concentration  
389 independent recruitment of a limiting RNAPII on the genome. Finally, we propose that the  
390 nucleus is the scaling unit and that nuclear size may participate in setting scaling levels.

391 Our work supports a simple and robust model for the scaling of gene expression with cell  
392 size in which the competition between promoters for a limited pool of RNAPII determines  
393 their relative strength. Because RNAPII maintains a constant concentration as cell size  
394 increases (as proteins do in general), the number of RNAPII complexes increase linearly  
395 with cell size. cell size increase will not affect the relative strength of promoters, but will  
396 cause their absolute rate of transcriptional initiation to scale linearly with cell size, exactly as  
397 required to produce the observed gene expression scaling.

398 Our model assumes that the general and specific transcription factors that regulate relative  
399 promoter strength are in excess even in small cells, and thus are not affected by cell size. To  
400 gain a deeper mechanistic understanding of scaling, it will be important to determine whether  
401 this assumption is met for most regulators or if some escape the rule. It could also inform  
402 about mechanisms through which some mRNA escape regulation by scaling as our  
403 modelling results suggest that non-limiting initiation rates can produce this behaviour [10–  
404 12]. Another interesting question will be to determine the role of chromatin remodellers in  
405 facilitating transcription initiation in larger cells. It is possible that a more permissive  
406 chromatin environment in large cells synergises with increased RNAPII local concentrations  
407 to support higher transcription rates of inducible genes.

408 Recent evidence suggests that, in mammals, burst size is regulated at the level of the  
409 proximal promoter sequence, while distal enhancers are involved in setting burst frequency  
410 [54]. Moreover, burst initiation and RNAPII pause/release but not RNAPII recruitment have  
411 been shown to be regulated in response to biological perturbations [55]. Our model of  
412 scaling through initiation of RNAPII transcription fits well with these data as this process is  
413 independent of both gene activation and control of burst frequency. It is also consistent with  
414 the observation that promoters maintain their relative expression levels in changing growth  
415 conditions [56].

416 Our observation that scaling is regulated at the level of single nuclei in multinucleated cells  
417 and may be linked to nuclear size is interesting. RNA synthesis levels have been connected  
418 to nuclear size in other systems such as multinucleated muscle cells [57], or for the HTLV-1  
419 mRNA [58]. It could reflect a higher availability of RNA polymerases around larger nuclei as  
420 these tend to be surrounded by larger cytoplasmic volume (**Figure S5A**) [48,57].  
421 Interestingly, the nucleus was also found to be an independent transcriptional unit in mature

422 osteoclasts [59] and in multinucleated fungi where nuclei retain local control of cell cycle  
423 periodic transcription [60,61]. This suggests that more complex feedback and molecular  
424 mechanisms may also be at play.

425 An important result from our study, which is not directly related to scaling, is the absence of  
426 bursty transcription for most fission yeast genes tested. This is in line with previous  
427 observations in budding yeast and plants [29,38,62]. Transcriptional bursts result in high  
428 gene expression noise and are associated with Fano factors ( $\frac{\sigma^2}{\mu}$  of mRNA numbers) greater  
429 than 1, whereas Poissonian birth-death processes have a Fano factor = 1. Our finding that  
430 most transcription followed a non-bursty regime relied on our modelling taking cell size and  
431 the cell cycle into account explicitly. Without doing so, all genes in this study have been  
432 thought to have bursty expression as Fano factors calculated on the raw counts were well  
433 above 1 (not shown). This reiterates the importance of studying gene expression considering  
434 potential confounding effects of morphological features such as cell size and the cell cycle  
435 [23,24,29,63,64].

436 Finally, in addition to progressing our understanding of the mechanisms behind scaling, this  
437 study provides a large quantitative dataset of gene expression and cell size measurement in  
438 over 20000 cells in various conditions. This will support future modelling efforts aimed at  
439 understanding regulation of gene expression.

440

## 441 **ACKNOWLEDGEMENTS**

442 We would like to thank Nick Rhind for stimulating discussion and his help with formulating  
443 our model of scaling. We are grateful to Kurt Schmoller, Philipp Thomas, Marc Sturrock and  
444 Nick Rhind for critical reading of the manuscript. We thank Snezhana Oliferenko and Jürg  
445 Bähler for sharing strains. This research was supported by the UK Medical Research  
446 Council, a Leverhulme Research Project Grant (RPG-2014-408). It used the computing  
447 resources of the UK Medical Bioinformatics partnership (UK MED-BIO), which is supported  
448 by the UK Medical Research Council (grant MR/L01632X/1) and the Imperial College High  
449 Performance Computing Service. ChIP-seq data have been deposited in ArrayExpress,  
450 accession number XXXXXX.

451

452

453

## 454 **METHODS**

### 455 **Strains and culture conditions**

456 The strains and their genotypes that were used in this study are listed in **Table S1**. Genetic  
457 crossing confirmed by polymerase chain reaction was used for strains generated unless  
458 otherwise specified. Strains were revived from glycerol frozen stocks on solid yeast extract  
459 agar (YE agar), or YE agar supplemented with 25 mg l<sup>-1</sup> adenine, L-histidine, L-leucine,  
460 uracil, L-lysine, and L-arginine (Sigma), and with or without appropriate antibiotics for  
461 selection. YE agar plates were incubated for approximately 48 h at 32°C in a static incubator  
462 until visible large colonies could be observed. Single colonies were transferred into liquid  
463 yeast extract medium (YE), in YE supplemented as above (YES), Edinburgh minimal  
464 medium (EMM), or EMM supplemented as above (EMMS), unless otherwise indicated in  
465 figure legends, and incubated at 170 rpm in a shaking incubator. Temperature sensitive  
466 strains were grown at 32°C and shifted to 36.5°C for the time indicated in figure legends. For  
467 the induction of *sib1* expression, the strains were grown at 25°C to an optical density at 600  
468 nm (OD<sub>600</sub>) of ≈0.4 and treated with 2,2-dipyridyl (DIP; ACROS) at a final concentration of  
469 250 μM for the time indicated in figure legends, or left untreated. For measuring mRNA  
470 decay rates, cells were grown in YE at 25°C to OD<sub>600</sub> ≈0.4; cells were treated with thiolutin  
471 (AXXORA) for the time indicated at a final concentration of 15 μg/ml, or left untreated. For  
472 *urg1* induction, cells were grown in EMM supplemented with or without 0.25 mg/ml uracil for  
473 the time indicated. For transcription inhibition, log phase cultures (OD<sub>600</sub>~0.5) were treated  
474 with thiolutin (15 ug/ml) and same volume of DMSO (used for dissolve thiolutin) was added  
475 to thiolutin untreated culture. Samples were taken at 0, 25, 35, 45 mins and processed as for  
476 smFISH. For live-cell experiments, cells were grown in EMMS in syphonstats – chemostat-  
477 like devices (<http://klavinslab.org/hardware.html>) which maintain the turbidity of liquid  
478 cultures by diluting with fresh medium appropriately – and maintained at OD<sub>600</sub> 0.4 at 32°C  
479 by frequent dilution [65].

### 480 **RNA single molecule fluorescence in situ hybridisation (smFISH)**

481 All smFISH datasets are described in **Table S2**. All the mRNA counts, nascent site  
482 intensities and cell size measurements are available in **Table S3**. smFISH samples were  
483 prepared according to a method modified from published protocols [66,67]. Briefly, cells  
484 were fixed in 4% formaldehyde and the cell wall partially digested using zymolyase. Cells  
485 were permeabilised in 70% ethanol, pre-blocked with bovine serum albumin and salmon  
486 sperm DNA, and incubated overnight with custom Stellaris oligonucleotide sets (Biosearch  
487 Technologies) labelled with CAL Fluor Red 610, Quasar 670, or Quasar 570 (probe  
488 sequences are listed in **Table S4**). Cells were mounted in ProLong™ Gold antifade

489 mountant with DAPI (Molecular Probes), and imaged on a Leica TCS Sp8 confocal  
490 microscope, using a 63x oil objective (NA 1.40). Optical z sections were acquired (0.3  $\mu$ m  
491 step size) for each scan to cover the entire depth of cells. Cell boundaries were outlined  
492 manually and single mRNA molecules were identified and counted using the FISH-quant  
493 MATLAB package [68]. Cell area, length, and width were quantified using custom ImageJ  
494 macros. The technical error in FISH-quant detection was estimated at 6–7% by quantifying  
495 *rpb1* mRNA foci with two sets of probes labelled with different dyes. The nascent mRNA foci  
496 were identified and quantified using intensity information from the above-mentioned FISH  
497 quantification where an intensity 2.5 to 3-fold above the modal intensity within the same cell  
498 was chosen as a threshold for nascent mRNA. The quality of the identification of nascent  
499 sites was validated manually by visualising high intensity foci in the nucleus, with an  
500 accuracy of over 90% in all three strains (wild-type, *cdc25-22*, and *wee1-50*).

### 501 **ChIP-seq**

502 Chromatin immunoprecipitation (ChIP) assays was carried out essentially according to  
503 published methods [69]. In brief, cells were grown in YES to an OD600 of  $\sim$  0.8 and fixed  
504 with formaldehyde solution (1% final) and then quenched with glycine. After washing twice  
505 with cold PBS (phosphate-buffered saline), cells were re-suspended in lysis buffer containing  
506 proteases inhibitors and disrupted vigorously with acid-washed glass beads 8-11 times for  
507 20 sec in a FastPrep instrument. Samples were then sonicated in Bioruptor (at High setting  
508 and 6 times 5 mins with 30 secs ON/30 secs OFF). Chromatin were immunoprecipitated with  
509 antibody against Rpb1 (ab817) or Rpb1 CTD-ser 5 (ab5408 or sigma 04-1572), which were  
510 coupled to Dynabead protein-G and protein-A and Dynabead sheep anti-mouse or rat IgG  
511 (Invitrogene). DNA was purified from immunoprecipitated samples using MinElute Qiagen  
512 kit. Quantification of the DNA was done using QuDye dsDNA HS assay kit and quality was  
513 verified using Bioanalyzer.

514 For sequencing DNA from immunoprecipitated samples, the libraries were made using the  
515 NEBNext ChIP-Seq Library Prep Master Mix Set for Illumina (E6240S) with the indexes  
516 provided in NEBBext Multiplex Oligos for Illumina (Index Primers Set1,2 and 3). Negative  
517 control DNA are those from the same chromatin extracts without going through  
518 immunoprecipitation steps. Pools of libraries were sequenced on an Illumina HiSeq 2500  
519 instrument at the MRC LMS genomics facility. Paired-end reads (100 nt) were generated  
520 from two pools of 12 or 18 samples per sequencing lane. Data were processed using RTA  
521 1.18.64, with default filter and quality settings. The reads were de-multiplexed with bcl2fastq-  
522 1.8.4 (CASAVA, allowing 0 mismatches).

### 523 **ChIP-seq analysis**

524 A description of ChIP-seq libraries can be found in **Table S5**. Sequencing reads were  
525 aligned to the fission yeast genome as available in PomBase in July 2019 using BWA  
526 [70,71]. For figure 3G, RNAPII occupancy counts were extracted for each transcript using  
527 HTseq [72] and the fission yeast annotation available in PomBase in July 2019 [71]. Data  
528 were normalised using DESeq2 and scaled using the mean counts of fission yeast histone  
529 genes as a scaling factor to allow comparison of global RNAPII occupancy between size  
530 mutants [73]. Amounts of histone proteins are thought to scale with DNA content rather than  
531 cell volume and are commonly used as normalisation factors for absolute proteomics  
532 measurements [74]. Moreover, average synthesis rates of histones were found to remain  
533 constant across a wide range of sizes in budding yeast (Kurt Schmoller personal  
534 communication). For figures 3H and S3I, RNAPII immunoprecipitation data were normalised  
535 with their respective input and average gene analysis was performed using the deeptools  
536 analysis suite [75].

### 537 **Live-cell microscopy and analysis**

538 Strains of interest and wild-type ySBM2 were grown from single colonies in 5 ml YES before  
539 they were transferred into syphonstats and maintained at  $OD_{600}$  0.4 overnight in EMMS.  
540 Prior to microscopy, ySBM2 cells were mixed at a 1:10 ratio with each strain of interest and  
541 diluted to a final  $OD_{600}$  of 0.3 in fresh EMMS. Cells were loaded directly into a CellASIC®  
542 ONIX Y04C-02 microfluidic plate (EMD Millipore) according to the manufacturer instructions.  
543 Fresh EMMS was continually perfused through the growth chamber with a constant pressure  
544 of 6.9 kPa (approximately 3  $\mu$ l/h). Cells were imaged on an Olympus IX70 inverted widefield  
545 fluorescence microscope with an environmental chamber maintained at 32°C, with a high  
546 precision motorised XYZ stage (ASI), controlled with  $\mu$ Manager version 1.4.22 [76]. Cells  
547 were continually imaged at a 10 minute interval with a 40 $\times$  objective (NA 0.95, UPlanSApo;  
548 Olympus) with brightfield (30 ms exposure), GFP (250 ms exposure, emission filter Semrock  
549 514/30 nm), and dsRed (500 ms exposure, emission filter Semrock 617/73 nm) channels  
550 captured by a Hamamatsu Orca Flash 4.0 V2 sCMOS camera, with illumination provided by  
551 a Lumencor Spectra X LED light source set to 20% power. For each of the four growth  
552 chambers within the microfluidic plate, three positions were defined, each of which was  
553 focussed using the software autofocus using the brightfield channel; since this feature was  
554 generally inaccurate, a 3  $\mu$ m Z-stack was used around the autofocus position to ensure that  
555 at least one Z-position was in focus for each position.

556 Initial analysis was performed with Fiji – a derivative of ImageJ – with time-lapses assembled  
557 if necessary, and in-focus slices for each time-point selected using a custom macro (written  
558 by Stephen Rothery, Facility for Imaging by Light Microscopy, Imperial College London),  
559 resulting in a 4-dimensional OME-TIFF file for each field-of-view (XYCT). Each file was

560 subsequently analysed using a series of custom Python scripts utilising the scikit-image,  
561 SciPy, NumPy, and pandas packages extensively among others. The scripts permit the  
562 semi-automated definition of cell boundaries (segmentation) within the brightfield channel,  
563 followed by the quantification of fluorescence within cell boundaries, identification of nuclei,  
564 further quantification within nuclear boundaries, and assignment of cells into lineages. Cell  
565 segmentation was effected using a custom 'balloon-filling' algorithm, in which a connected  
566 series of nodes is 'inflated' from its centre inducing an outwards force on all nodes; this  
567 outward force is counteracted by an 'image force', which applies an opposing force inversely  
568 proportional to the intensity of pixels neighbouring the node, this has the effect of preventing  
569 nodes from expanding through areas of low light intensity – which generally surrounds the  
570 cell boundary; finally each node is also affected by its direct neighbouring nodes which pull  
571 each node sideways according to their position, ensuring smooth contours. Together, after  
572 multiple iterations, nodes migrate from a central location until the forces equilibrate at areas  
573 of low light intensity (generally the edge of the cell). This procedure can be performed in an  
574 automated manner in which iterations cease when the area contained within the nodes does  
575 not significantly change, or in a supervised manner, in which further iterations are prompted  
576 manually via a keyboard command, with progress displayed via a graphical interface. Initial  
577 centres of cells are defined either by manually clicking, or by the centre of the cell in the  
578 previous frame. Nuclei are defined as areas within the cell boundary which have red  
579 fluorescence pixel intensity values greater than 1.1 standard deviations above the mean  
580 intensity within the whole cell boundary. Time from mitosis is defined as the number of hours  
581 from the point at which the number of detected nuclei increases from one to two.  
582 Fluorescence intensity is adjusted for uneven illumination according to a series of empty  
583 fields imaged using the same settings. Background and autofluorescence is determined from  
584 wild-type cells cultured within the same field-of-view, with the mean level of fluorescence  
585 within these cells subtracted from measurements. Fluorescence is normalised by cell or  
586 nuclear area by dividing total fluorescence of all pixels within their respective boundary by  
587 the area of that boundary. Scripts are available upon request.

588 For live cell imaging in Figure S4, cells were imaged in ibidi microfluidic channel slides  
589 ( $\mu$ slide VI 0.4, #80601) instead of a CellASIC ONIX microfluidic plate. 30  $\mu$ L of cells sampled  
590 from syphonstat cultures maintained at OD<sub>600</sub>=0.5 for at least 15 generations were loaded  
591 into channels of a pre-warmed slide. 40  $\mu$ L of pre-warmed EMMS was then added to each  
592 reservoir of channels, followed by 10  $\mu$ L of mineral oil (Sigma, M5904) to prevent  
593 evaporation during imaging. Live-cell microscopy was performed as described above.

594 Image analysis was semi-automated and performed using custom interactive MATLAB  
595 scripts available upon request. Tracks corresponding to individual cell cycles are recorded



596 by user clicking. Only cell cycles for which cells remained in in focus for at least the 2 hours  
597 preceding mitosis were collected. Local background subtraction was automatically applied to  
598 fluorescence images. Cell segmentation was performed automatically based on thresholding  
599 of the brightfield images. Nuclear segmentation was performed automatically based on  
600 thresholding of the uch2-mCherry fluorescence images.

## 601 **Cell size measurements**

602 We extracted both cell area and cell length measurements from the smFISH images as  
603 proxies for cell volume. We observed that both measurements support robustly data  
604 characteristics such as scaling of mRNA numbers and positive intercepts. We used cell  
605 length as a proxy for cell volume throughout the manuscript as it proved to be a simpler and  
606 more consistent measure. Importantly, as fission yeast has a cylindrical shape, its length is  
607 directly proportional to its volume. For the nucleus, we acquired area measurements only. As  
608 the nucleus is spherical, area and volume are not proportional. We have therefore derived  
609 volume estimates from area measurements assuming a perfect sphere using:

$$610 \text{ volume} = 4/3 * \pi * (\text{area}/\pi)^{3/2}$$

611

## 612 **Mathematical modelling**

613 We use agent-based simulations of stochastic gene expression coupled to cell size in  
614 growing and dividing cells (**Figure 2A**) [24]. We assume cells grow exponentially with a  
615 constant growth rate from birth to division that is sampled from a truncated Gaussian  
616 distribution with mean  $m_g$  and standard deviation  $\sigma_g$ . A cell that is born with birth length  $L_i$   
617 grows until it reaches the division length  $L_f$ . We use a phenomenological model of cell size  
618 control that relates the final size to initial size through a noisy linear map, which captures  
619 experimentally observed variability and correlations in cell size [77–79].

$$620 L_f = aL_i + b + \eta_b \quad (1)$$

621 where  $a$  and  $b$  are size control parameters ( $a = 0$  denotes a sizer mechanism and  $a = 1$  an  
622 adder mechanism) and  $\eta_b$  is a truncated Gaussian with mean zero and standard deviation  
623  $\sigma_b$ . The dividing cell of length  $L_f$  produces two daughter cells with birth sizes  $L'_i$  and  $L_f - L'_i$ ,  
624 where  $L'_i = L_f \eta_d$  and  $\eta_d$  is another truncated Gaussian with mean 0.5 and standard  
625 deviation  $\sigma_d$ . The biomolecules such as mRNA molecules (except for DNA) are binomially  
626 partitioned in the daughter cells with a probability proportional to the daughter cell size  
627  $L'_i$ . As shown in **Figure 2A**, we simulate a fixed number of cells, so upon cell division one of

628 the existing cells (including one of the newly born daughter cells) is chosen randomly and  
629 taken out of the simulation. This ensures we are simulating a constant number of cells in  
630 time and can produce snap-shot data with the correct cell age and size distribution as  
631 observed in the experimental data. This has been used in the simulations used in the ABC  
632 inference (**Figure 2**). For the modelling results shown in **Figure 3 and 5**, where the results  
633 are conditioned on cell size, we have used a simpler scheme [24], where upon cell division  
634 only one of the daughter cells is followed modelling a single lineage (similar to the data  
635 generated in a mother machine) [80]. The simulations are performed using a simple  
636 algorithm that uses discretised time steps to simulate exactly the Gillespie method [81] with  
637 time-dependent parameters [82]. The simulation code for inference is written in the Julia  
638 programming language and the rest of simulations are performed in R. The codes are  
639 available upon request.

640 Our main gene expression model is the so-called telegraph model or the two-state model  
641 [83] where the gene can be in an ‘off’ or an ‘on’ state and transcription can only occur when  
642 the gene is on (**Figure 2A**). If the gene is always on then this model reduces to a simple  
643 non-bursty birth-death process with parameters transcription rate  $v$  and mRNA decay rate  $d$ .  
644 Here the mRNA counts per cell have a Poisson distribution (in the absence of cell cycle  
645 effects). In the limit where the duration of the promotor on-state is shorter than the mRNA life  
646 time we have the bursty limit characterised by 3 parameters of average burst frequency  $k_{on}$ ,  
647 average burst size  $v/k_{off}$  and mRNA decay rate  $d$ . In this model, birth events are  
648 simulated as geometrically distributed increases in mRNA numbers [84]. For **Figure 2B**  
649 model selection, we used four variants of this model including the Poisson and bursty limits  
650 with or without transcriptional dependence to cell size. Transcriptional scaling is modelled as  
651 linear dependence of transcription rate or burst size to cell size ( $v(L) = v_0L$ , where,  $v_0$  is a  
652 constant and  $L$ , is the cell length). The models for the cell cycle regulated genes, assume that  
653 there is a point in the cell cycle, where gene expression increases from a basal level to an  
654 active level. ABC model selection in **Figure 2E** is performed on the data from the  
655 transcription shut-off experiments of the 3 strains of *wt*, *wee1-50*, and *cdc25-22*. The 3  
656 models included are all the Poisson limit with different scaling assumptions for transcription  
657 and decay rates. Model one assumes transcriptional scaling with a single constant decay  
658 rate across the 3 strains, the second model assumes also transcriptional scaling but with 3  
659 different constant decay rates within each strain. And the third model assumes constant  
660 transcription and decay rate that is proportional to inverse cell size across the 3 strains. The  
661 priors used in the model selection, are wide over a physiological range. The model selection  
662 results were not too sensitive to the choice of the priors.



663 In **Figure 3D** a more detailed model of transcription is illustrated, which is based on the  
664 totally asymmetric simple exclusion process (TASEP) [6,39–41]. Here, the promoter is  
665 assumed to be always active, i.e. we are modelling a non-bursty gene. The gene is modelled  
666 as a lattice of size  $L_G$ . Transcription starts by initiation through binding of a RNAPII molecule  
667 to the first site on the gene with rate  $\alpha$  if the site is empty. Elongation is modelled as hopping  
668 of RNAPII forward with rate  $\beta$  if the next site is available. Termination is modelled with  
669 RNAPII leaving the last site on the gene with rate  $\gamma$  which gives rise to a fully transcribed  
670 mRNA. In our model, we have ignored pausing, backtracking and incomplete termination. In  
671 **Figure 3E**, we compare 3 variants of this model, where size scaling is through linear  
672 coupling of initiation, elongation or termination rate to cell size. We chose  $L_G = 20$  for  
673 computational efficiency and as it is larger than the typically observed number of RNAPIIs on  
674 the genes, which is related to nascent site intensity (**Figure 3A**). In each model, we  
675 randomly picked the initiation time scale  $\tau_I$ , elongation time scale through the whole gene  
676  $\tau_E$ , and termination time scale  $\tau_T$  between 0.001-0.1 hours that produces average mRNA  
677 numbers of between 20-30 for a moderately expressed gene. The lower limit on the time  
678 scale is significantly shorter than the mRNA life time and the upper limit represents very slow  
679 steps to achieve moderate transcription, given the mRNA life time, and is also slower than  
680 the time-scales reported in the literature [cite]. The rates are inversely proportional to the  
681 time-scales as  $\alpha = 1/\tau_I$ ,  $\beta = L_G/\tau_E$  and  $\gamma = 1/\tau_T$ . Note that as  $\beta$  is the rate of hopping per  
682 site, it is also proportional to the number of sites on the gene  $L_G$ . We also performed an ABC  
683 model selection using an implementation of our TASEP model in Julia on several datasets  
684 (**Figure S3G**). We used the same prior as discussed above.

685 The nuclear scaling model and the RNAPII model in **Figure 5E** rely on both cell size and  
686 nuclear size dynamics. It is known that nuclear size scales closely with cell size [48]. There  
687 has not been much modelling of nuclear size control in the literature. We introduce a  
688 phenomenological and passive model of cell and nuclear size control, extending the noisy  
689 linear map of cell size control (**Equation 1**). We assume cellular exponential growth, cell size  
690 control and division as before. We assume nuclear size also grows exponentially and follows  
691 its own noisy linear map:

$$L_{Nf} = a_N L_{Ni} + b_N + \eta_{bN}$$

693 Cell division time is determined when cells reach their final size ( $L_f$ ). For simplicity, we  
694 assume mitosis is taking place at cell division and the size of the newly divided daughter  
695 cells and their nucleus is determined by  $L'_i = L_f \eta_d$  and  $L'_{Ni} = L_{Nf} \eta_{Nd}$ , where  $\eta_d$  and  $\eta_{Nd}$  are  
696 truncated correlated Gaussian noise with mean equal 0.5, standard deviations  $\sigma_d$  and  $\sigma_{Nd}$

697 and correlation coefficient of  $\rho_d$ . We choose  $\rho_d = 0.5$  based on analysis of our time-lapse  
698 imaging data (**Figure 4**) and the rest of the parameters of our dual noisy linear map model of  
699 cell and nuclear control were fitted on the static pom1 mutant size data using the ABC  
700 inference.

701 Given, our dual noisy linear map model discussed above, in the nuclear scaling model  
702 (**Figure 5E**), we assume transcription rate  $v$  to be linearly dependent on the nuclear size  $L_N$   
703 but mRNAs are partitioned upon division based on the size of the daughter cells (not nuclear  
704 size of the daughter cells). In this model a small daughter cell is likely to inherit a nucleus of  
705 average size, with transcription rates higher than expected from cell size, resulting in an  
706 increase in mRNA concentration for small cells.

707 The RNAPII model (**Figure 5F**) provides a mechanistic RNAPII based model of  
708 transcriptional scaling. In this hybrid deterministic and stochastic model, transcription,  
709 translation, complex formation and maturation of RNAPII molecules are modelled as simple  
710 cell size dependent production steps. The RNAPII is then transported to the nucleus by a  
711 nuclear size dependent rate and it binds to DNA with high affinity with a rate that is  
712 dependent on the concentration of DNA in the nucleus (inversely proportional to nuclear  
713 size). In this model transcription rate of a gene is assumed to be proportional to the amount  
714 of DNA-bound RNAPII.

715 In this hybrid deterministic and stochastic model, RNAPII dynamics are modelled  
716 deterministically by a series of ODEs inside growing and dividing cells, while transcription of  
717 mRNA is modelled stochastically. Upon cell division, we assume mRNA are partitioned  
718 binomially according to the size of the daughter cells. The free cytosolic and nuclear RNAPII  
719 are portioned binomially according to the size of the daughter cells and their nucleus. The  
720 scaling in this model comes about from sequestration of RNAPII on the DNA. The model is  
721 very robust to different model parameters and assumptions as long as the level of free  
722 cytosolic and nuclear RNAPII is much smaller than the DNA bound RNAPII. The qualitative  
723 model results for Rpb1 shown in **Figure 5E**, are obtained by using the parameters of the  
724 dual noisy linear map model discussed above for the pom1 mutant, tuning RNAPII  
725 parameters to obtain about 10% free RNAPII and linear scaling of DNA bound RNAPII, as  
726 well as setting the transcription rate to match expression levels of Rpb1. The model without  
727 any further tuning recovers deviation from concentration homeostasis observed at small cell  
728 sizes, which is observed for the different genes in the WT and Pom1 mutant strains.

729 **ABC inference and model selection**

730 In this study we have used Approximate Bayesian Computation (ABC) for inference. When  
731 the likelihood function is intractable, we require a tool for carrying out inference without it.  
732 ABC is precisely such a tool. The algorithm originated in the 1980s and 90s (see e.g. [85]).  
733 For review of more recent developments, see [15]. ABC aims to carry out Bayesian  
734 inference without having to evaluate the likelihood function. Given data  $D$  and model with  
735 parameter set  $\theta$ , this is done by approximating the posterior distribution:

$$736 \quad P(\theta|D) = \frac{P(D|\theta)P(\theta)}{P(D)} \approx P(\theta|\rho(D, D_\theta) < \varepsilon)$$

737 Where  $D_\theta$  is a set of data generated from the model with parameters  $\theta$ , sampled from the  
738 prior  $P(\theta)$ ,  $\rho(D, D_\theta)$  is a distance measure that is defined on the set of such datasets (or their  
739 summary statistics) and  $\varepsilon$  is a tolerance, representing the degree of approximation we are  
740 willing to accept. The simplest ABC algorithm, that is based on sampling  $\theta$  repeatedly and  
741 rejecting the ones that produce data with larger distance than our tolerance (which is called  
742 ABC rejection sampling [86]), is too inefficient. Much work has been carried out over the past  
743 decade in this area, leading to a variety of different implementations with much more  
744 favourable scaling of computation time with the dimensionality of the parameter space [86].  
745 For the purpose of this project we will use a Sequential Monte Carlo implementation, based  
746 on the implementations of Toni et. al [87] (ABC-SMC) and Lenormand et.al [88] (APMC). In  
747 the ABC-SMC, one fixes the size of the posterior sample,  $N$ , and a finite sequence of  
748 decreasing tolerances,  $\{\varepsilon_t\}$ , a priori. The primary differences between APMC and ABC-SMC  
749 are firstly that the sequence of epsilons is not determined a priori; it is dynamically  
750 determined from the previous iteration's distribution of errors until a stopping criterion  
751 ( $pacc_{min}$ ) is fulfilled and secondly that simulations from earlier iterations are not discarded.  
752 ABC lends itself very naturally to model selection [86,87]. In essence, all we have to do is to  
753 extend our priors to one extra dimension, representing different models. Formally, we require  
754 a joint prior distribution over models and parameters,  $P(M, \theta)$ . We have combined the model  
755 selection aspects of ABC-SMC implementation and adaptive aspect of APMC to obtain our  
756 APMC with model selection algorithm.

757 In order to apply our APMC algorithm, we need to choose an appropriate distance  $\rho(D, D_\theta)$ .  
758 As the problem at hand is stochastic in nature, we have chosen to use sum of square  
759 differences of summary statistics of the data and simulated data in the distance measure:

$$760 \quad \rho(D, D_\theta) = \sqrt{\sum_i \left( \frac{m_i(D) - m_i(D_\theta)}{sd(m_i(D))} \right)^2}$$

761 where, we used central sample moments and cross moments  $m_i(D)$  of our data up to order  
762 3. With our data sample sizes, moments beyond the first three are usually too noisy to be

763 useful. Also, each term in the distance measure are weighted by the bootstrap estimates of  
764 standard deviation of the central moments. This rescales the terms in the sum appropriately  
765 and downweights the noisier moments, helping to prevent overfitting of the data.

766

767

768 **FIGURE LEGENDS**

769

770 **Figure 1: Gene expression scaling is a single cell attribute of constitutive and**  
771 **inducible gene expression. A.** Representative images of an smFISH experiment. The  
772 *rpb1*, *rpb2*, and *rpb3* mRNA are labelled in *wee1-50*, *cdc25-22*, and *wt* cells. Overlay of the  
773 three channels and DAPI staining of DNA are shown in the last column. The white scale bar  
774 represents 5 $\mu$ m. **B.** Log<sub>2</sub> average copies/cell of 7 mRNAs in *wee1-50* (green) and *cdc25-22*  
775 (red) cells plotted against log<sub>2</sub> average copies/cell of the same mRNAs in *wt* cells. mRNA  
776 common names are shown on the figure. Plain line shows equality and dotted lines values 2  
777 fold up or down. **C.** *rpb1* mRNA copies/cell plotted against cell length for *wee1-50* (green), *wt*  
778 (blue), *cdc25-22* (red) and *wt* diploid cells (orange). **D.** *ace2* mRNA copies/cell plotted  
779 against cell length for *wee1-50* (green), *wt* (blue), *cdc25-22* (red) and *wt* diploid cells  
780 (orange). **E.** *urg1* mRNA copies/cell plotted against cell length for *wee1-50* (green), *wt* (blue),  
781 *cdc25-22* (red) cells. Cells were analysed 3h after addition of uracil to the medium. **F.** same  
782 as C. with all the cells in grey. The solid line shows median counts in running windows  
783 sampled from 100 bootstrap samples of the experimental data and the shaded area  
784 represents 95% confidence intervals. Only cells above the dotted lines were considered as  
785 expressing the mRNA and were used for the running window analysis. **G.** same as D. with  
786 all the cells in grey. The solid line shows median counts in running windows sampled from  
787 100 bootstrap samples of the experimental data and the shaded area represents 95%  
788 confidence intervals. Only cells above the dotted lines were considered as expressing the  
789 mRNA and were used for the running window analysis. **H.** same as E. with all the cells in  
790 grey. The solid line shows median counts in running windows sampled from 100 bootstrap  
791 samples of the experimental data and the shaded area represents 95% confidence intervals.  
792 Only cells above the dotted lines were considered as expressing the mRNA and were used  
793 for the running window analysis.

794

795 **Figure 2: Coordination of transcription rates to cell size and not burst frequency nor**  
796 **mRNA decay rates mediates scaling. A.** Cartoon of the modelling strategies used in this  
797 section (**methods**). Domino-like shapes represent cells/agents with mRNA pictured as  
798 yellow dots. Modelling of the cell cycle uses a noisy linear map framework and population  
799 size is kept constant by removing a random cell for every division event. The left part of the  
800 figures represents the two states model of gene expression. The transcription rate  $v$  and  
801 degradation rate  $d$  can be coupled to cell length ( $L$ ). **B.** Bar chart showing the sum of particle  
802 weights for four models of transcription scaling after model selection analysis. Results for

803 genes with three types of regulation are shown. Constitutive: constitutively expressed genes,  
804 Periodic: cell cycle regulated genes, Regulated: genes regulated by external stimuli. For  
805 regulated genes, times after addition of 2,2-dipyridyl (*sib1*) or uracil (*urg1*) are shown. The  
806 four types of model used in this analysis are marked on the right. Poisson: non-bursty  
807 transcription, Bursty: bursty transcription, Constant: constant transcription rates during the  
808 cell cycle, Scaling: transcription rates scaling with cell length (**methods**). **C.** Simulation of  
809 mRNA numbers during the cell-cycle using a model where transcription is scaling under a  
810 poisson regime. Coefficients of variation (CV) are plotted as a function of mean simulated  
811 mRNA numbers for each particle of each mRNA. Yellow circles denote the median of  
812 simulated data for all particles of a given mRNA. Red circles denote median for all  
813 experimental data used for parameter inference. **D.** Expression correlation between pairs of  
814 mRNA in single cells. smFISH experimental measurements are marked by orange dots with  
815 the 95% confidence interval shown with orange bars. 95% confidence intervals for  
816 correlations obtained from model simulations as in C are shown with blue bars. Red bars  
817 show the 95% confidence interval for simulations including 20% additional extrinsic noise  
818 (**methods**). **E.** Bar chart showing the sum of particle weights for three models of mRNA  
819 degradation after model selection analysis. Decay rate scaling: transcription constant and  
820 degradation rates scale with cell length, Constant single: *wt*, *wee1-50*, and *cdc25-22* cells  
821 have an identical constant degradation rate during the cell cycle with transcriptional scaling.  
822 Constant multiple: *wt*, *wee1-50*, and *cdc25-22* cells have distinct constant degradation rates  
823 during the cell cycle with transcriptional scaling.

824 **Figure 3: Coordination of RNAPII initiation rates with cell size as the main mechanism**  
825 **of scaling.** **A.** *rpb1* normalised nascent sites intensities plotted against their respective cell  
826 length for *wee1-50* (green), *wt* (blue), *cdc25-22* (red). **B.** same as A. with all the cells in grey.  
827 The solid line shows median counts in running windows sampled from a count distribution  
828 identical to the experimental data. Shaded area represents 95% confidence intervals  
829 (methods). Cells with no nascent sites are excluded. Pearson correlation coefficient of  
830 nascent site intensity and length is shown. **C.** Boxplots of normalised nascent intensities for  
831 *rpb1* and the cell cycle regulated genes *ace2*, *mid2* and *fkf2*. Intensities are compared  
832 between haploid (green), diploid (yellow, orange), and *rpb1* heterozygote deletion cells  
833 (purple). For diploid cells the yellow boxplot shows intensities of single nascent sites, and  
834 orange boxplots show the total nascent intensities per cell. **D.** Cartoon of the TASEP  
835 modelling strategy of RNAPII transcription. A gene is represented by a lattice of length  $L_G$ .  
836 RNAPII molecules enter the lattice at a rate  $\alpha$  (Initiation), hop through the lattice at a rate  $\beta$   
837 (Elongation) and exit the lattice at a rate  $\gamma$  (Termination, **methods**). **E.** Transcription linear  
838 scaling captured by the TASEP model where rates  $\alpha$  (Initiation),  $\beta$  (Elongation) or  $\gamma$



839 (Termination) are linked to cell length. Simulations were run with each model with 500  
840 random sets of TASEP parameters  $\alpha, \beta$  and  $\gamma$  over times scales of 0.001 to 0.1 hours  
841 (**methods**). Deviation from linearity is shown for parameter samples in each of the 3 model  
842 variants. For each parameter set 1500 cells are simulated and two linear regressions are  
843 done on the mRNA numbers vs cell length data for the smaller and larger half of simulated  
844 cells. The deviation from linearity is estimated as the difference between the linear  
845 regression coefficients of small vs large cells. Values close to zero indicate a linear scaling  
846 and larger values indicate saturation of mRNA numbers at large cells. The dashed line  
847 shows the error in estimating the slope of the linear fit. Note that the initiation model shows  
848 the most robust linearity. **F.** Fraction of cells with a nascent site (“Transcribing fraction”)   
849 plotted as a function of mean cell length for the *rpb1* mRNA in a series of strains of different  
850 average length. Strains names are labelled next to the data points. Red line shows linear  
851 regression and  $R^2$  is shown in the top left corner. **G.** Chromatin immunoprecipitation analysis  
852 of RNAPII occupancy in *wee1-50* (green), *wt* (blue), and *cdc25-22* (red) cells. RNAP ChIP-  
853 seq data for antibodies against Serine 5 CTD phosphorylation (left, middle) and total  
854 Rbp1(right) are shown. RNAP occupancy values were normalised using DEseq2 and scaled  
855 using occupancy at histone genes (**methods**). **H.** RNAPII occupancy 5’/3’ ratio in *wee1-50*  
856 (green), *wt* (blue), and *cdc25-22* (red) cells. RNAP ChIP-seq data for antibodies against  
857 Serine 5 CTD phosphorylation (left, middle) and total Rbp1(right) are shown. RNAP  
858 occupancy values were normalised to input samples and each gene was divided into 100  
859 bins using the deeptools package. Ratios between mean occupancy in bins 1-50 compared  
860 to bins 51-100 are shown (**methods**). Note that ratios are not changing with size and are  
861 consistently lower than 1.

862 **Figure 4: Nuclear RNA Polymerase II concentration increases with cell size. A.**  
863 Confocal images of Rpb1, Rpb9, and Hta2 proteins tagged with GFP in *wt* fission yeast cells.  
864 DAPI staining for DNA and overlay of both channels are shown. The white scale bar  
865 represents 5 $\mu$ m. **B.** Widefield fluorescence data from live-cell imaging RNAPII subunit Rpb9.  
866 Normalised intensity/cell as a proxy for total cellular protein concentration is plotted along  
867 time relative to the mitotic phase of the cell cycle. **C.** Widefield fluorescence data from live-  
868 cell imaging RNAPII subunit Rpb9. Total pixel intensity in the area of strong fluorescence  
869 signal as a proxy for chromatin bound amounts is plotted along time relative to the mitotic  
870 phase of the cell cycle. **D.** As in B. but for the histone protein Hta2. **E.** As in C. but for the  
871 histone protein Hta2.

872 **Figure 5: The nucleus is the scaling unit. A.** Representative smFISH images for the *rpb1*  
873 and *rpb2* mRNA in *cdc11-119* grown at non-permissive temperature. The white scale bar  
874 represents 5 $\mu$ m. **B.** *rpb1* normalised nascent sites intensities per nucleus (blue) or per cell

875 (orange) plotted as a function of each cell respective size. Red lines are regression lines  
876 from linear models. The white scale bar represents 5 $\mu$ m. **C.** Representative smFISH images  
877 for the *rpb1*, *rpb2*, and *shd1* mRNA in *wt* and *pom1* deletion mutants carrying the Cut11-  
878 GFP nuclear marker (left column). Overlay is shown on the right. The white scale bar  
879 represents 5 $\mu$ m. **D.** mRNA concentration (mRNA/cell length) for the *rpb1*, *rpb2*, and *shd1*  
880 mRNA in *wt* (black) and *pom1* deletion mutants (red). The solid line shows median counts in  
881 running windows sampled from a count distribution identical to the experimental data.  
882 Shaded area represents 95% confidence intervals. **E.** *rpb1* concentrations measured by  
883 smFISH are plotted as a function of cell length. Running average for the experimental data  
884 (grey) or derived from model predictions assuming transcription rates scaling with cell length  
885 (magenta), nuclear area (green), or predicted from a mechanistic model of RNAPII prediction  
886 are shown (light blue). **F.** Cartoon representation of a mechanistic model of RNAPII  
887 transcription (see Methods for details and parameters).

888 **Figure S1 related to Figure 1. A.** Cell length distribution for the 111 datasets described in  
889 this study. Colours represent different genotypes. Datasets are described in **Table S2**.  
890 Coloured lines show the interquartile range for all the *wee1-50* (green), *wt* (blue), *cdc25-22*  
891 (red), diploid and heterozygote deletions (orange) and *pom1 $\Delta$  (light blue) cells. **B.** Top:  
892 Pooled count distribution of 7 constitutively expressed genes in *wee1-50* (green), *wt* (blue),  
893 and *cdc15-22* (red) cells. Bottom: Median counts of 7 constitutively expressed genes as a  
894 function of cell length in running windows sampled from a count distribution identical to the  
895 experimental data. Shaded area represents 95% confidence intervals (**methods**). Data from  
896 *wee1-50*, *wt*, *cdc15-22* cells are pooled and gene names are indicated next to their  
897 respective data line. **C.** Deviation from linearity is plotted as a function of linearity P-values  
898 (see Figure 3E, **methods**). Low P-values mean significant deviation from linearity. Colours  
899 are as in panel A. P-values equal 0.05 and 0.001 are shown with dashed lines and  
900 annotated. **D.** *rpb1* mRNA copies/cell plotted against cell length for diploid (orange), *cdc25-22*  
901 (red) and *rpb1* heterozygote diploid (purple). The solid line shows median counts in  
902 running windows sampled from a count distribution identical to the experimental data.  
903 Shaded area represents 95% confidence intervals (**methods**). **E.** *myo1* mRNA copies/cell  
904 plotted against cell length for diploid (orange), *cdc25-22* (red) and *myo1* heterozygote diploid  
905 (purple). The solid line shows median counts in running windows sampled from a count  
906 distribution identical to the experimental data. Shaded area represents 95% confidence  
907 intervals (**methods**). **F.** *pan1* mRNA copies/cell plotted against cell length for diploid  
908 (orange), *cdc25-22* (red) and *pan1* heterozygote diploid (purple). The solid line shows  
909 median counts in running windows sampled from a count distribution identical to the  
910 experimental data. Shaded area represents 95% confidence intervals (**methods**). **G.***



911 Representative images of an smFISH experiment for cell cycle regulated genes. The *mid2*,  
912 *fkh2*, and *ace2* mRNA are labelled in *wee1-50*, *cdc25-22* and *wt* cells. Overlay of the three  
913 channels and DAPI staining of DNA is shown on the last column. The white scale bar  
914 represents 5 $\mu$ m. **H.** Representative images of an smFISH experiment for a gene regulated  
915 by external conditions (*urg1*). The *urg1*, *ace2*, and *rpb1* mRNA are labelled in *wt* cells  
916 before, 3 hours and 12 hours after addition of uracil to the culture. Overlay of the three  
917 channels and DAPI staining of DNA is shown on the last column. The white scale bar  
918 represents 5 $\mu$ m. **I.** *mid2* mRNA copies/cell plotted against cell length for *wee1-50* (green), *wt*  
919 (blue), *cdc25-22* (red). The solid line shows median counts in running windows sampled  
920 from a count distribution identical to the experimental data. Shaded area represents 95%  
921 confidence intervals (**methods**). Only cells above the dotted lines were considered as  
922 expressing the mRNA and were used for the running window analysis. **J.** *fkh2* mRNA  
923 copies/cell plotted against cell length for *wee1-50* (green), *wt* (blue), *cdc25-22* (red). The  
924 solid line shows median counts in running windows sampled from a count distribution  
925 identical to the experimental data. Shaded area represents 95% confidence intervals  
926 (**methods**). Only cells above the dotted lines were considered as expressing the mRNA and  
927 were used for the running window analysis. **K.** *sib1* mRNA copies/cell plotted against cell  
928 length for *wt* cells before (light blue), 20min after (blue) or 45min (pink) after addition of 2,2-  
929 dipyridyl (DIP). The solid line shows median counts in running windows sampled from a  
930 counts distribution identical to the experimental data. Shaded area represents 95%  
931 confidence intervals (**methods**).

932 **Figure S2 related to Figure 2. A.** Representative images of smFISH experiments for the  
933 *rpb1* mRNA in cells before ( $t = 0$ ) and after a 45min ( $t = 45$ ) treatment with 15  $\mu$ g/ml of  
934 Thiolutin. Note the number of mRNA dots decreases with time and that the transcription foci  
935 disappear after treatment. The white scale bar represents 5 $\mu$ m. **B. Left:** mRNA half-lives  
936 were measured after Thiolutin treatment in bins of increasing cell length for the *rpb1* (2  
937 repeats) and *rpb2* mRNA in *wee1-50*, *wt*, and *cdc25-22* cells (left). **Right:** mRNA half-lives  
938 were measured after *nmt41* promoter switch-off in bins of increasing cell length for the *rpb1*,  
939 *rpb2* and *rtp1* mRNA in *wt* cells.

940 **Figure S3 related to figure 3. A.** Representative images of smFISH experiments for the  
941 *rpb1* mRNA in haploid and diploid cells. Nascent transcription sites are indicated with white  
942 arrows. The white scale bar represents 5 $\mu$ m. **B.** Fraction of cells with 1, 2, or 3 nascent sites  
943 (as in A) in haploid and diploid cells. Note the diploid cells have mostly 2 sites validating our  
944 approach specificity and sensitivity to detect nascent transcription sites. **C.** Boxplot of  
945 nascent sites intensities for the *rpb1* gene in *wee1-50* (green), *wt* (blue) and *cdc25-22* (red)  
946 (related to **Figure 3A**). **D.** Pearson correlation between mRNA numbers and cell length for

947 the simulation data from **Figure 3E**. **E**. Histogram of ratio of initiation time scale ( $1/\alpha$ ) and  
948 the sum of elongation time scale and termination time scale ( $\frac{L_G}{\beta} + \frac{1}{\gamma}$ ) for parameter sets  
949 resulting in linear scaling and parameter sets resulting in saturating transcription scaling  
950 indicating that initiation rate should be limiting for linear transcriptional scaling. **F**. Elongation  
951 time of a 2kb gene obtained from the simulations from **Figure 3E** for the models with  
952 Initiation rates ( $\alpha$ , green) and elongation rates ( $\beta$ , red) coupled with size. Only simulation that  
953 achieved linearity are shown. Elongation time from published experimental measurements of  
954 elongation rates (1-2kb/min) are shown. Note that the elongation scaling simulations require  
955 elongation rates much slower than experimentally measured in order to achieve linearity. **G**.  
956 ABC model selection results between the initiation scaling and elongation scaling TASEP  
957 models for 3 genes across several strains. **H**. Distribution of the correlations of frequencies  
958 of actively transcribing cells with cell length for different parameter sets from the **Figure 3E**  
959 simulations. Note the strong positive correlations as observed in experimental data (**Figure**  
960 **3F**). **I**. Boxplot of correlations between normalised intensities of the rpb1 mRNA and cell  
961 length for all cell genotypes in sliding windows or containing different number of cells. Each  
962 box represents a window of a given width. Sliding windows are shifted with increment of 1  
963 cell along all cells ordered by length. Note that correlations are mainly positive. **J**. Average  
964 gene analysis for the RNAPII ChIP-seq data from Figure 3H. Data were normalised to input  
965 samples and split in 200 bins (50: upstream, 100: gene, 50: downstream) using the  
966 deeptools package.

967 **Figure S4 related to figure 4**. **A**. Representative image of a single cell followed for a full  
968 cell-cycle using ibidi slides. Brightfield (top), the nuclear marker Uch2 (middle) and the  
969 RNAPII subunit Rpb1 bottom. **B**. Rpb1 normalised intensity/cell as a proxy for total cellular  
970 protein concentration is plotted along time relative to the mitotic phase of the cell cycle. **C**.  
971 Rpb9 total pixel intensity in the area of strong fluorescence signal (green mask in A) as a  
972 proxy for chromatin bound amounts is plotted along time relative to the mitotic phase of the  
973 cell cycle.

974 **Figure S5 related to figure 5**. **A**. Ratios of nascent site intensities of bi-nucleated cdc11-  
975 119 cells plotted as a function of the ratio of local cytoplasmic volumes (**methods**). The  
976 black line is the regression line from a linear model. **B**. Correlation between cell length and  
977 nuclear area in pom1 $\Delta$  (red) and wt (black) cells. Pearson correlations are shown. **C**. As in  
978 **Figure 5D** for mRNA numbers. **D**. As in **Figure 5D** for mRNA numbers/nuclear volume  
979 plotted as a function of nuclear volume. **E**. Simulation data from the model described in  
980 **Figure 5F**. DNA bound RNAPII is plotted as a function of cell length. Magenta lines show a  
981 running average. **F**. As in **Figure 5E** for mRNA numbers divided by nuclear area.

982

983 **REFERENCES**

984

985

986 1. Marguerat, S., and Bähler, J. (2012). Coordinating genome expression with cell size.  
987 Trends Genet. 28, 560–5.

988 2. Schmoller, K.M., and Skotheim, J.M. (2015). The Biosynthetic Basis of Cell Size  
989 Control. Trends Cell Biol.

990 3. Zhurinsky, J., Leonhard, K., Watt, S., Marguerat, S., Bähler, J., and Nurse, P. (2010).  
991 A coordinated global control over cellular transcription. Curr. Biol. CB 20, 2010–2015.

992 4. Padovan-Merhar, O., Nair, G.P., Biaesch, A.G., Mayer, A., Scarfone, S., Foley, S.W.,  
993 Wu, A.R., Churchman, L.S., Singh, A., and Raj, A. (2015). Single Mammalian Cells  
994 Compensate for Differences in Cellular Volume and DNA Copy Number through  
995 Independent Global Transcriptional Mechanisms. Mol. Cell 58, 339–52.

996 5. Kempe, H., Schwabe, A., Crémazy, F., Verschure, P.J., and Bruggeman, F.J. (2015).  
997 The volumes and transcript counts of single cells reveal concentration homeostasis  
998 and capture biological noise. Mol. Biol. Cell 26, 797–804.

999 6. Ietswaart, R., Rosa, S., Wu, Z., Dean, C., Howard, M., Ietswaart, R., Rosa, S., Wu, Z.,  
1000 Dean, C., and Howard, M. (2017). Cell-Size-Dependent Transcription of FLC and Its  
1001 Antisense Long Non-coding RNA COOLAIR Explain Article Cell-Size-Dependent  
1002 Transcription of FLC and Its Antisense Long Non-coding RNA COOLAIR Explain Cell-  
1003 to-Cell Expression Variation. Cell Syst. 4, 622-635.e9.

1004 7. Mena, A., Medina, D.A., García-Martínez, J., Begley, V., Singh, A., Chávez, S.,  
1005 Muñoz-Centeno, M.C., and Pérez-Ortín, J.E. (2017). Asymmetric cell division requires  
1006 specific mechanisms for adjusting global transcription. Nucleic Acids Res. 45, 12401–  
1007 12412.

1008 8. García-Martínez, J., Delgado-Ramos, L., Ayala, G., Pelechano, V., Medina, D.A.,  
1009 Carrasco, F., González, R., Andrés-León, E., Steinmetz, L., Warringer, J., *et al.*  
1010 (2016). The cellular growth rate controls overall mRNA turnover, and modulates either  
1011 transcription or degradation rates of particular gene regulons. Nucleic Acids Res. 44,  
1012 3643–3658.

1013 9. García-Martínez, J., Troulé, K., Chávez, S., and Pérez-Ortín, J.E. (2016). Growth rate  
1014 controls mRNA turnover in steady and non-steady states. RNA Biol. 13, 1175–1181.

1015 10. Schmoller, K.M., Turner, J.J., Kõivomägi, M., and Skotheim, J.M. (2015). Dilution of  
1016 the cell cycle inhibitor Whi5 controls budding-yeast cell size. Nature 526, 268–72.

1017 11. Keifenheim, D., Sun, X.-M., D'Souza, E., Ohira, M.J., Magner, M., Mayhew, M.B.,  
1018 Marguerat, S., and Rhind, N. (2017). Size-Dependent Expression of the Mitotic  
1019 Activator Cdc25 Suggests a Mechanism of Size Control in Fission Yeast. Curr. Biol.  
1020 27, 1491-1497.e4.

1021 12. Saint, M., Bertaux, F., Tang, W., Sun, X.-M., Game, L., Köferle, A., Bähler, J.,  
1022 Shahrezaei, V., and Marguerat, S. (2019). Single-cell imaging and RNA sequencing  
1023 reveal patterns of gene expression heterogeneity during fission yeast growth and  
1024 adaptation. Nat. Microbiol. 4, 480–491.

1025 13. Swain, P.S., Elowitz, M.B., and Siggia, E.D. (2002). Intrinsic and extrinsic

- 1026 contributions to stochasticity in gene expression. *Proc. Natl. Acad. Sci. U. S. A.* **99**,  
1027 12795–800.
- 1028 14. Sanchez, A., and Golding, I. (2013). Genetic determinants and cellular constraints in  
1029 noisy gene expression. *Science* **342**, 1188–93.
- 1030 15. Coulon, A., Chow, C.C., Singer, R.H., and Larson, D.R. (2013). Eukaryotic  
1031 transcriptional dynamics: From single molecules to cell populations. *Nat. Rev. Genet.*  
1032 **14**, 572–584.
- 1033 16. Adelman, K., and Lis, J.T. (2012). Promoter-proximal pausing of RNA polymerase II:  
1034 emerging roles in metazoans. *Nat. Rev. Genet.* **13**, 720–731.
- 1035 17. Chen, F.X., Smith, E.R., and Shilatifard, A. (2018). Born to run: Control of  
1036 transcription elongation by RNA polymerase II. *Nat. Rev. Mol. Cell Biol.* **19**, 464–478.
- 1037 18. Proudfoot, N.J. (2016). Transcriptional termination in mammals: Stopping the RNA  
1038 polymerase II juggernaut. *Science (80-. )*. **352**.
- 1039 19. Heldt, F.S., Lunstone, R., Tyson, J.J., and Novák, B. (2018). Dilution and titration of  
1040 cell-cycle regulators may control cell size in budding yeast. *PLoS Comput. Biol.* **14**, 1–  
1041 26.
- 1042 20. Lin, J., and Amir, A. (2018). Homeostasis of protein and mRNA concentrations in  
1043 growing cells. *Nat. Commun.* **9**, 4496.
- 1044 21. Raj, A., van den Bogaard, P., Rifkin, S.A., van Oudenaarden, A., and Tyagi, S.  
1045 (2008). Imaging individual mRNA molecules using multiple singly labeled probes. *Nat.*  
1046 *Methods* **5**, 877–879.
- 1047 22. Ciechonska, M., Sturrock, M., Grob, A., Larrouy-Maumus, G., Shahrezaei, V., and  
1048 Isalan, M. (2019). Ohm's Law for emergent gene expression under fitness pressure.  
1049 *bioRxiv*, 693234.
- 1050 23. Thomas, P. (2019). Intrinsic and extrinsic noise of gene expression in lineage trees.  
1051 *Sci. Rep.* **9**, 474.
- 1052 24. Bertaux, F., Marguerat, S., and Shahrezaei, V. (2018). Division rate, cell size and  
1053 proteome allocation: impact on gene expression noise and implications for the  
1054 dynamics of genetic circuits. *R. Soc. Open Sci.* **5**, 172234.
- 1055 25. McAdams, H.H., and Arkin, A. (1997). Stochastic mechanisms in gene expression.  
1056 *Proc. Natl. Acad. Sci. U. S. A.* **94**, 814–9.
- 1057 26. Thattai, M., and van Oudenaarden, A. (2001). Intrinsic noise in gene regulatory  
1058 networks. *Proc. Natl. Acad. Sci. U. S. A.* **98**, 8614–9.
- 1059 27. Munsky, B., Trinh, B., and Khammash, M. (2009). Listening to the noise: random  
1060 fluctuations reveal gene network parameters. *Mol. Syst. Biol.* **5**, 318.
- 1061 28. Zechner, C., Ruess, J., Krenn, P., Pelet, S., Peter, M., Lygeros, J., and Koepl, H.  
1062 (2012). Moment-based inference predicts bimodality in transient gene expression.  
1063 *Proc. Natl. Acad. Sci. U. S. A.* **109**, 8340–5.
- 1064 29. Zechner, C., Unger, M., Pelet, S., Peter, M., and Koepl, H. (2014). Scalable  
1065 inference of heterogeneous reaction kinetics from pooled single-cell recordings. *Nat.*  
1066 *Methods* **11**, 197–202.
- 1067 30. Fritsch, C., Baumgärtner, S., Kuban, M., Steinshorn, D., Reid, G., and Legewie, S.  
1068 (2018). Estrogen-dependent control and cell-to-cell variability of transcriptional  
1069 bursting. *Mol. Syst. Biol.* **14**, e7678.

- 1070 31. Suter, D.M., Molina, N., Gatfield, D., Schneider, K., Schibler, U., and Naef, F. (2011).  
1071 Mammalian genes are transcribed with widely different bursting kinetics. *Science* 332,  
1072 472–4.
- 1073 32. Komorowski, M., Costa, M.J., Rand, D.A., and Stumpf, M.P.H. (2011). Sensitivity,  
1074 robustness, and identifiability in stochastic chemical kinetics models. *Proc. Natl. Acad.*  
1075 *Sci. U. S. A.* 108, 8645–50.
- 1076 33. Tiberi, S., Walsh, M., Cavallaro, M., Hebenstreit, D., and Finkenstädt, B. (2018).  
1077 Bayesian inference on stochastic gene transcription from flow cytometry data.  
1078 *Bioinformatics* 34, i647–i655.
- 1079 34. Watt, S., Mata, J., López-Maury, L., Marguerat, S., Burns, G., and Bähler, J. (2008).  
1080 *urg1*: a uracil-regulatable promoter system for fission yeast with short induction and  
1081 repression times. *PLoS One* 3, e1428.
- 1082 35. Mercier, A., and Labbé, S. (2010). Iron-Dependent remodeling of fungal metabolic  
1083 pathways associated with ferrichrome biosynthesis. *Appl. Environ. Microbiol.* 76,  
1084 3806–3817.
- 1085 36. Wilusz, C.J., and Wilusz, J. (2004). Bringing the role of mRNA decay in the control of  
1086 gene expression into focus. *Trends Genet.* 20, 491–497.
- 1087 37. Amorim, M.J., Cotobal, C., Duncan, C., and Mata, J. (2010). Global coordination of  
1088 transcriptional control and mRNA decay during cellular differentiation. *Mol. Syst. Biol.*  
1089 6, 380.
- 1090 38. Zenklusen, D., Larson, D.R., and Singer, R.H. (2008). Single-RNA counting reveals  
1091 alternative modes of gene expression in yeast. *Nat. Struct. Mol. Biol.* 15, 1263–1271.
- 1092 39. Zhao, Y.-B., and Krishnan, J. (2014). mRNA translation and protein synthesis: an  
1093 analysis of different modelling methodologies and a new PBN based approach. *BMC*  
1094 *Syst. Biol.* 8, 25.
- 1095 40. Sahoo, M., and Klumpp, S. (2013). Backtracking dynamics of RNA polymerase:  
1096 pausing and error correction. *J. Phys. Condens. Matter* 25, 374104.
- 1097 41. Voliotis, M., Cohen, N., Molina-París, C., and Liverpool, T.B. (2008). Fluctuations,  
1098 pauses, and backtracking in DNA transcription. *Biophys. J.* 94, 334–48.
- 1099 42. Dobrzynski, M., and Bruggeman, F.J. (2009). Elongation dynamics shape bursty  
1100 transcription and translation. *Proc. Natl. Acad. Sci. U. S. A.* 106, 2583–8.
- 1101 43. Darzacq, X., Shav-Tal, Y., de Turrís, V., Brody, Y., Shenoy, S.M., Phair, R.D., and  
1102 Singer, R.H. (2007). In vivo dynamics of RNA polymerase II transcription. *Nat. Struct.*  
1103 *Mol. Biol.* 14, 796–806.
- 1104 44. Edwards, A.M., Kane, C.M., Young, R.A., and Kornberg, R.D. (1991). Two dissociable  
1105 subunits of yeast RNA polymerase II stimulate the initiation of transcription at a  
1106 promoter in vitro. *J. Biol. Chem.* 266, 71–5.
- 1107 45. Mason, P.B., and Struhl, K. (2005). Distinction and relationship between elongation  
1108 rate and processivity of RNA polymerase II in vivo. *Mol. Cell* 17, 831–40.
- 1109 46. Pelechano, V., Chávez, S., and Pérez-Ortín, J.E. (2010). A Complete Set of Nascent  
1110 Transcription Rates for Yeast Genes. *PLoS One* 5, e15442.
- 1111 47. Swinburne, I.A., and Silver, P.A. (2008). Intron Delays and Transcriptional Timing  
1112 during Development. *Dev. Cell* 14, 324–330.
- 1113 48. Neumann, F.R., and Nurse, P. (2007). Nuclear size control in fission yeast. *J. Cell*



- 1114 Biol. 179, 593–600.
- 1115 49. Verde, F., Mata, J., and Nurse, P. (1995). Fission yeast cell morphogenesis:  
1116 identification of new genes and analysis of their role during the cell cycle. *J. Cell Biol.*  
1117 131, 1529–38.
- 1118 50. Bahler, J., and Pringle, J.R. (1998). Pom1p, a fission yeast protein kinase that  
1119 provides positional information for both polarized growth and cytokinesis. *Genes Dev.*  
1120 12, 1356–1370.
- 1121 51. Hayles, J., Wood, V., Jeffery, L., Hoe, K.-L., Kim, D.-U., Park, H.-O., Salas-Pino, S.,  
1122 Heichinger, C., and Nurse, P. (2013). A genome-wide resource of cell cycle and cell  
1123 shape genes of fission yeast. *Open Biol.* 3, 130053.
- 1124 52. Kim, D.-U., Hayles, J., Kim, D., Wood, V., Park, H.-O., Won, M., Yoo, H.-S., Duhig, T.,  
1125 Nam, M., Palmer, G., *et al.* (2010). Analysis of a genome-wide set of gene deletions in  
1126 the fission yeast *Schizosaccharomyces pombe*. *Nat. Biotechnol.* 28, 617–623.
- 1127 53. Weston, L., Greenwood, J., and Nurse, P. (2017). Genome-wide screen for cell  
1128 growth regulators in fission yeast. *J. Cell Sci.* 130, 2049–2055.
- 1129 54. Larsson, A.J.M., Johnsson, P., Hagemann-Jensen, M., Hartmanis, L., Faridani, O.R.,  
1130 Reinius, B., Segerstolpe, Å., Rivera, C.M., Ren, B., and Sandberg, R. (2019).  
1131 Genomic encoding of transcriptional burst kinetics. *Nature* 565, 251–254.
- 1132 55. Bartman, C.R., Hamagami, N., Keller, C.A., Giardine, B., Hardison, R.C., Blobel, G.A.,  
1133 and Raj, A. (2018). Transcriptional Burst Initiation and Polymerase Pause Release  
1134 Are Key Control Points of Transcriptional Regulation. *Mol. Cell.*
- 1135 56. Keren, L., Zackay, O., Lotan-Pompan, M., Barenholz, U., Dekel, E., Sasson, V.,  
1136 Aidelberg, G., Bren, A., Zeevi, D., Weinberger, A., *et al.* (2013). Promoters maintain  
1137 their relative activity levels under different growth conditions. *Mol. Syst. Biol.* 9, 701.
- 1138 57. Windner, S.E., Manhart, A., Brown, A., Mogilner, A., and Baylies, M.K. (2019).  
1139 Nuclear Scaling Is Coordinated among Individual Nuclei in Multinucleated Muscle  
1140 Fibers. *Dev. Cell* 49, 48-62.e3.
- 1141 58. Billman, M.R., Rueda, D., and Bangham, C.R.M. (2017). Single-cell heterogeneity and  
1142 cell-cycle-related viral gene bursts in the human leukaemia virus HTLV-1. *Wellcome*  
1143 *open Res.* 2, 87.
- 1144 59. Youn, M., Takada, I., Imai, Y., Yasuda, H., and Kato, S. (2010). Transcriptionally  
1145 active nuclei are selective in mature multinucleated osteoclasts. 1025–1035.
- 1146 60. Roberts, S.E., and Gladfelter, A.S. (2015). Nuclear autonomy in multinucleate fungi.  
1147 *Curr. Opin. Microbiol.* 28, 60–65.
- 1148 61. Dundon, S.E.R., Chang, S.-S., Kumar, A., Occhipinti, P., Shroff, H., Roper, M., and  
1149 Gladfelter, A.S. (2016). Clustered nuclei maintain autonomy and nucleocytoplasmic  
1150 ratio control in a syncytium. *Mol. Biol. Cell* 27, 2000–2007.
- 1151 62. Wu, Z., Ietswaart, R., Liu, F., Yang, H., Howard, M., and Dean, C. (2016). Quantitative  
1152 regulation of FLC via coordinated transcriptional initiation and elongation. *Proc. Natl.*  
1153 *Acad. Sci. U. S. A.* 113, 218–23.
- 1154 63. Battich, N., Stoeger, T., and Pelkmans, L. (2015). Control of Transcript Variability in  
1155 Single Mammalian Cells. *Cell* 163, 1596–1610.
- 1156 64. Soltani, M., Vargas-Garcia, C.A., Antunes, D., and Singh, A. (2016). Intercellular  
1157 Variability in Protein Levels from Stochastic Expression and Noisy Cell Cycle  
1158 Processes. *PLoS Comput. Biol.* 12, e1004972.

- 1159 65. Takahashi, C.N., Miller, A.W., Ekness, F., Dunham, M.J., and Klavins, E. (2015). A  
1160 Low Cost, Customizable Turbidostat for Use in Synthetic Circuit Characterization.  
1161 *ACS Synth. Biol.* *4*, 32–38.
- 1162 66. Heinrich, S., Geissen, E.-M., Kamenz, J., Trautmann, S., Widmer, C., Drewe, P.,  
1163 Knop, M., Radde, N., Hasenauer, J., and Hauf, S. (2013). Determinants of robustness  
1164 in spindle assembly checkpoint signalling. *Nat. Cell Biol.* *15*, 1328–39.
- 1165 67. Trcek, T., Chao, J.A., Larson, D.R., Park, H.Y., Zenklusen, D., Shenoy, S.M., and  
1166 Singer, R.H. (2012). Single-mRNA counting using fluorescent in situ hybridization in  
1167 budding yeast. *Nat. Protoc.* *7*, 408–19.
- 1168 68. Mueller, F., Senecal, A., Tantale, K., Marie-Nelly, H., Ly, N., Collin, O., Basyuk, E.,  
1169 Bertrand, E., Darzacq, X., and Zimmer, C. (2013). FISH-quant: automatic counting of  
1170 transcripts in 3D FISH images. *Nat. Methods* *10*, 277–278.
- 1171 69. Rodríguez-López, M., Gonzalez, S., Hillson, O., Tunnacliffe, E., Codlin, S., Tallada,  
1172 V.A., Bähler, J., and Rallis, C. (2019). The GATA transcription factor Gaf1 represses  
1173 tRNA genes, inhibits growth, and extends chronological lifespan downstream of  
1174 fission yeast TORC1. *bioRxiv*, 700286.
- 1175 70. Li, H., and Durbin, R. (2009). Fast and accurate short read alignment with Burrows-  
1176 Wheeler transform. *Bioinformatics* *25*, 1754–1760.
- 1177 71. Lock, A., Rutherford, K., Harris, M.A., Hayles, J., Oliver, S.G., Bähler, J., and Wood,  
1178 V. (2019). PomBase 2018: user-driven reimplement of the fission yeast database  
1179 provides rapid and intuitive access to diverse, interconnected information. *Nucleic  
1180 Acids Res.* *47*, D821–D827.
- 1181 72. Anders, S., Pyl, P.T., and Huber, W. (2015). HTSeq—a Python framework to work with  
1182 high-throughput sequencing data. *Bioinformatics* *31*, 166–169.
- 1183 73. Love, M.I., Huber, W., and Anders, S. (2014). Moderated estimation of fold change  
1184 and dispersion for RNA-seq data with DESeq2. *Genome Biol.* *15*, 550.
- 1185 74. Wiśniewski, J.R., Hein, M.Y., Cox, J., and Mann, M. (2014). A “proteomic ruler” for  
1186 protein copy number and concentration estimation without spike-in standards. *Mol.  
1187 Cell. Proteomics* *13*, 3497–506.
- 1188 75. Ramírez, F., Dündar, F., Diehl, S., Grüning, B.A., and Manke, T. (2014). deepTools: a  
1189 flexible platform for exploring deep-sequencing data. *Nucleic Acids Res.* *42*, W187–  
1190 W191.
- 1191 76. Edelstein, A.D., Tsuchida, M.A., Amodaj, N., Pinkard, H., Vale, R.D., and Stuurman,  
1192 N. (2014). Advanced methods of microscope control using  $\mu$ Manager software. *J.  
1193 Biol. Methods* *1*, 10.
- 1194 77. Amir, A. (2014). Cell size regulation in bacteria. *Phys. Rev. Lett.* *112*.
- 1195 78. Tanouchi, Y., Pai, A., Park, H., Huang, S., Stamatov, R., Buchler, N.E., and You, L.  
1196 (2015). A noisy linear map underlies oscillations in cell size and gene expression in  
1197 bacteria. *Nature* *523*, 357–360.
- 1198 79. Jun, S., and Taheri-Araghi, S. (2014). Cell-size maintenance: universal strategy  
1199 revealed. *Trends Microbiol.* *23*, 4–6.
- 1200 80. Wang, P., Robert, L., Pelletier, J., Dang, W.L., Taddei, F., Wright, A., and Jun, S.  
1201 (2010). Robust growth of *Escherichia coli*. *Curr. Biol.* *20*, 1099–103.
- 1202 81. Gillespie, D.T. (1977). Exact stochastic simulation of coupled chemical reactions. *J.  
1203 Phys. Chem.* *81*, 2340–2361.

- 1204 82. Shahrezaei, V., Ollivier, J.F., and Swain, P.S. (2008). Colored extrinsic fluctuations  
1205 and stochastic gene expression. *Mol. Syst. Biol.* 4, 196.
- 1206 83. Peccoud, J., and Ycart, B. (1995). Markovian Modeling of Gene-Product Synthesis.  
1207 *Theor. Popul. Biol.* 48, 222–234.
- 1208 84. Shahrezaei, V., and Swain, P.S. (2008). Analytical distributions for stochastic gene  
1209 expression. *Proc. Natl. Acad. Sci. U. S. A.* 105, 17256–61.
- 1210 85. Rubin, D.B. (1984). Bayesianly Justifiable and Relevant Frequency Calculations for  
1211 the Applied Statistician. *Ann. Stat.* 12, 1151–1172.
- 1212 86. Marin, J.-M., Pudlo, P., Robert, C.P., and Ryder, R.J. (2012). Approximate Bayesian  
1213 computational methods. *Stat. Comput.* 22, 1167–1180.
- 1214 87. Toni, T., Welch, D., Strelkowa, N., Ipsen, A., and Stumpf, M.P.. (2009). Approximate  
1215 Bayesian computation scheme for parameter inference and model selection in  
1216 dynamical systems. *J. R. Soc. Interface* 6, 187–202.
- 1217 88. Lenormand, M., Jabot, F., and Deffuant, G. (2015). Adaptive approximate bayesian  
1218 computation for complex models. *Comput. Stat.* 2013, 2777–2796.
- 1219



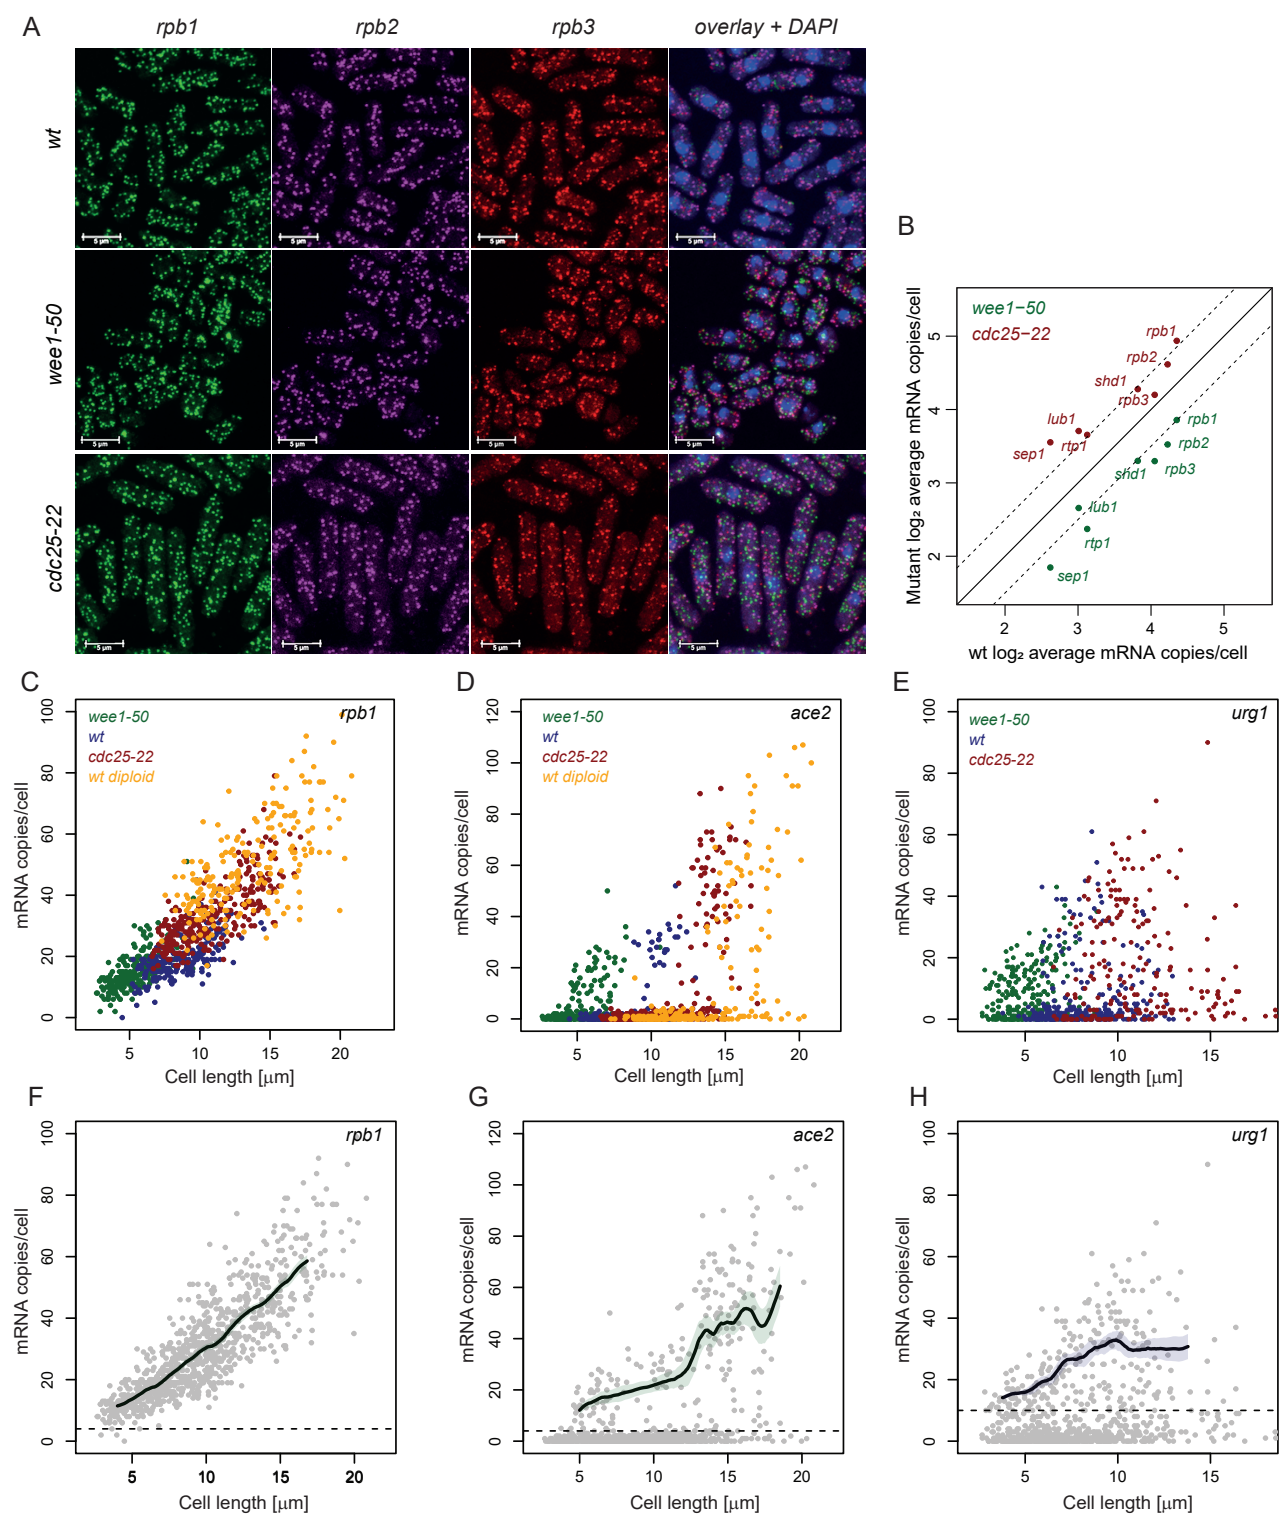

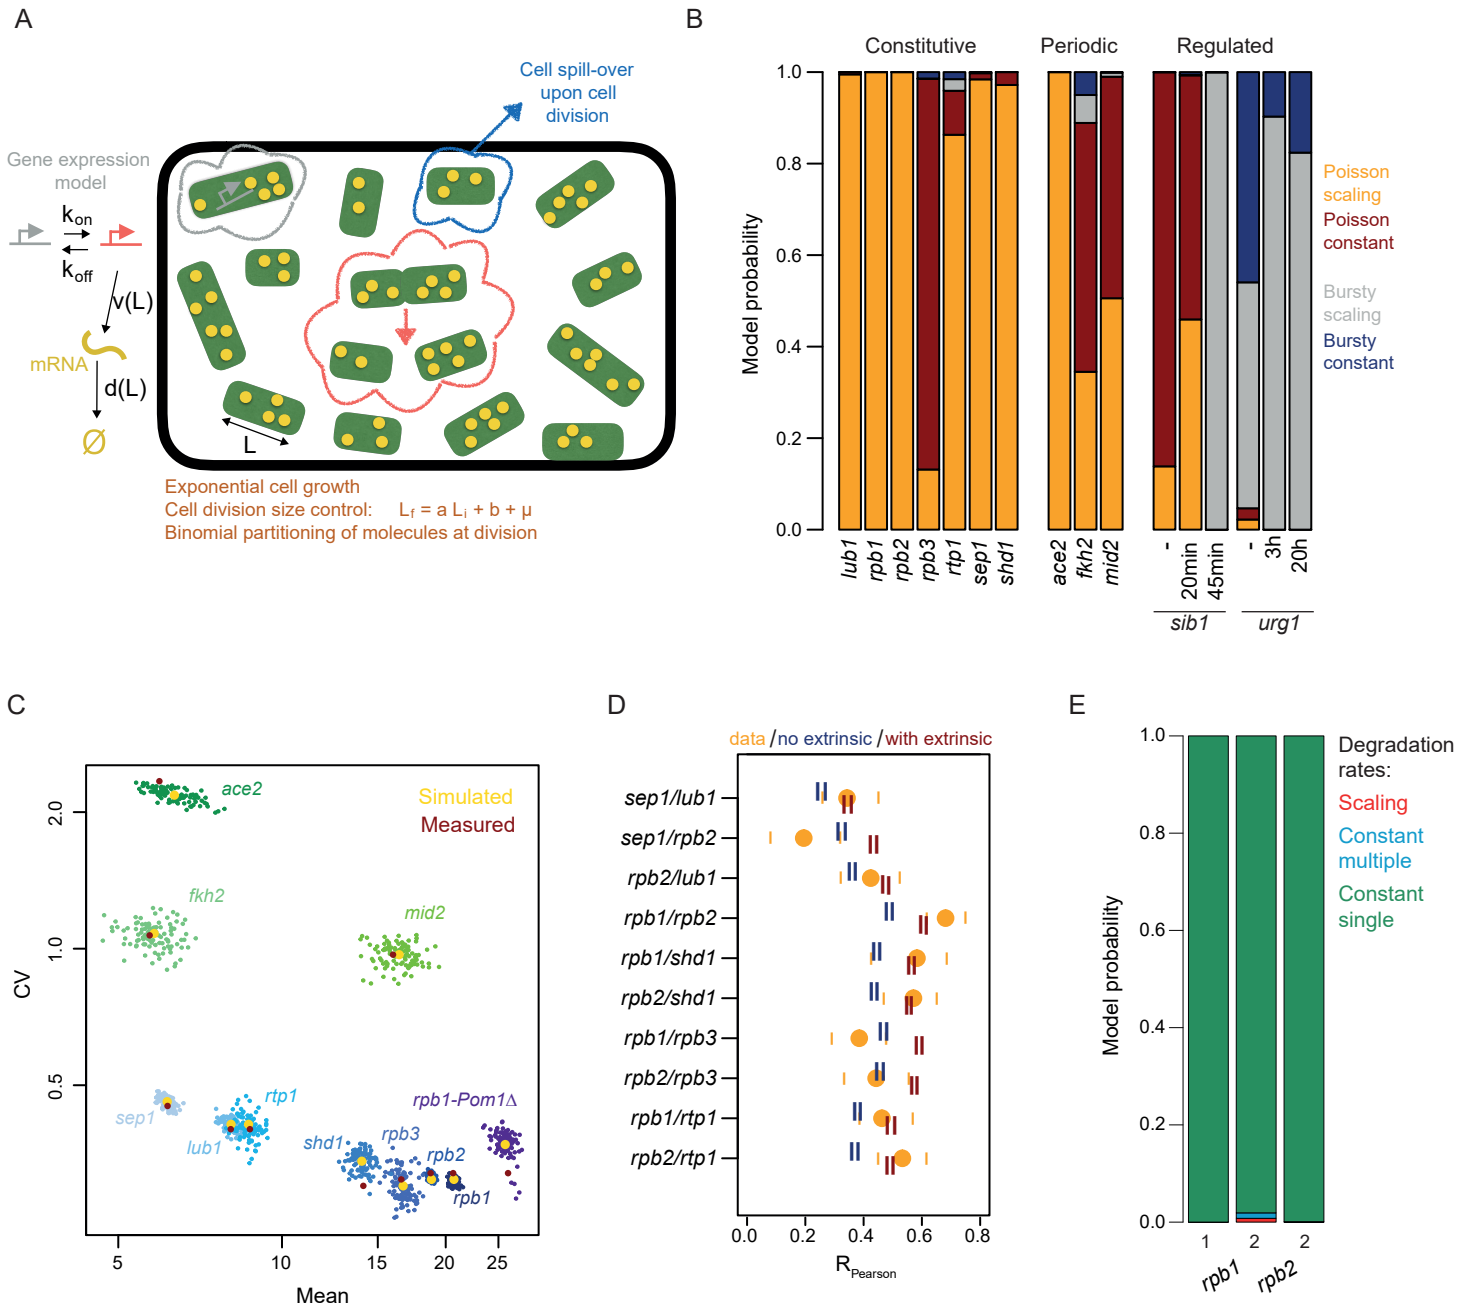

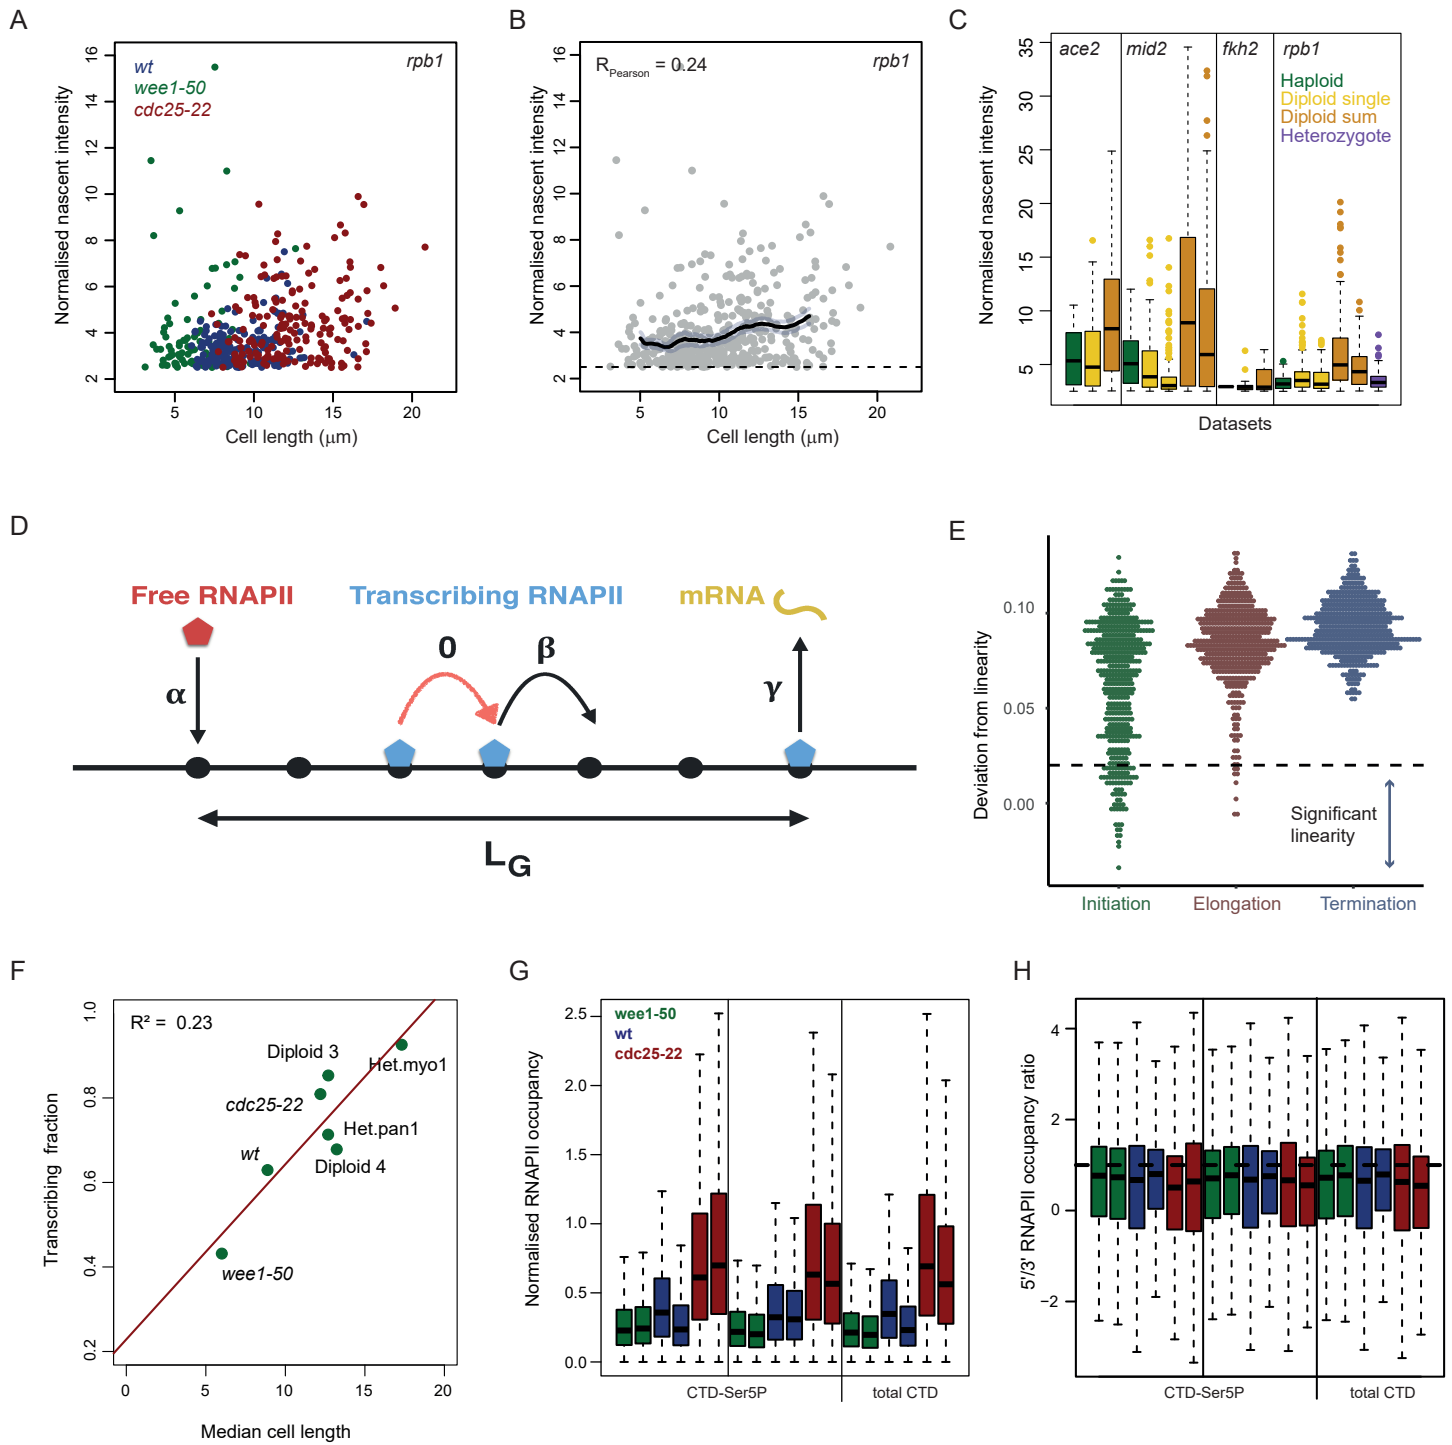

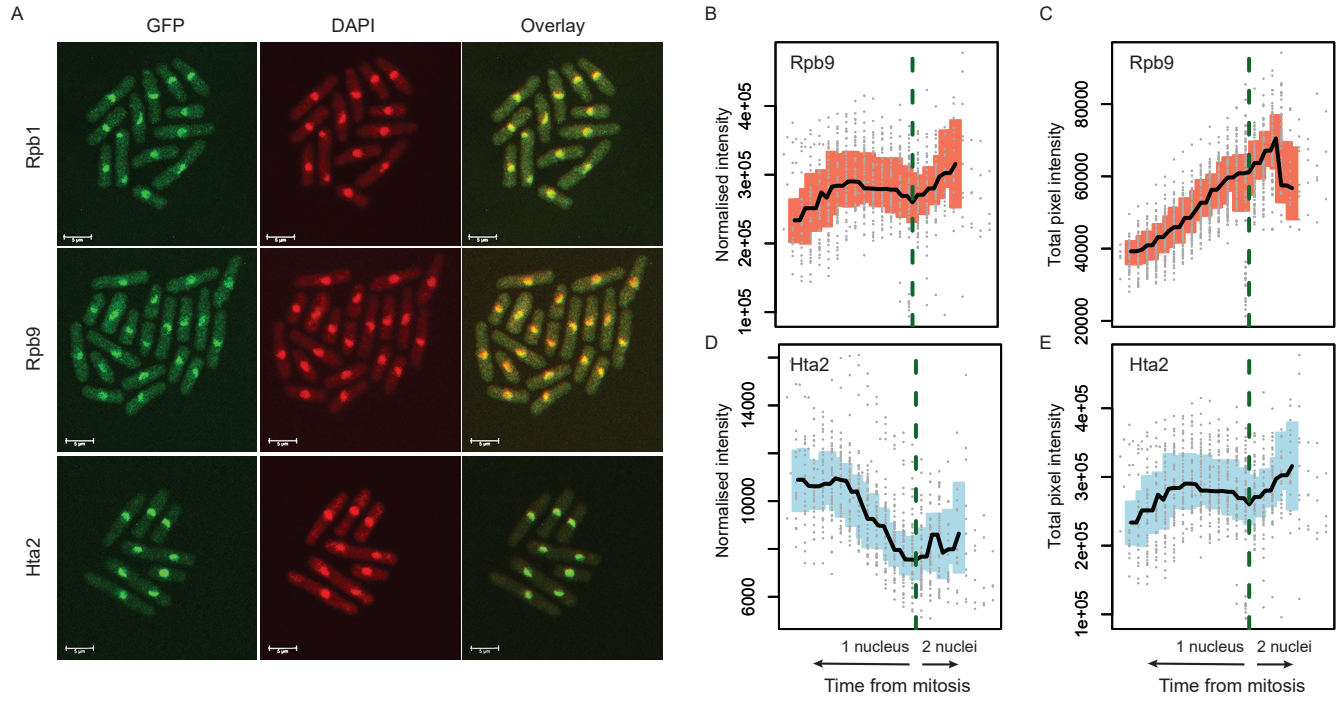

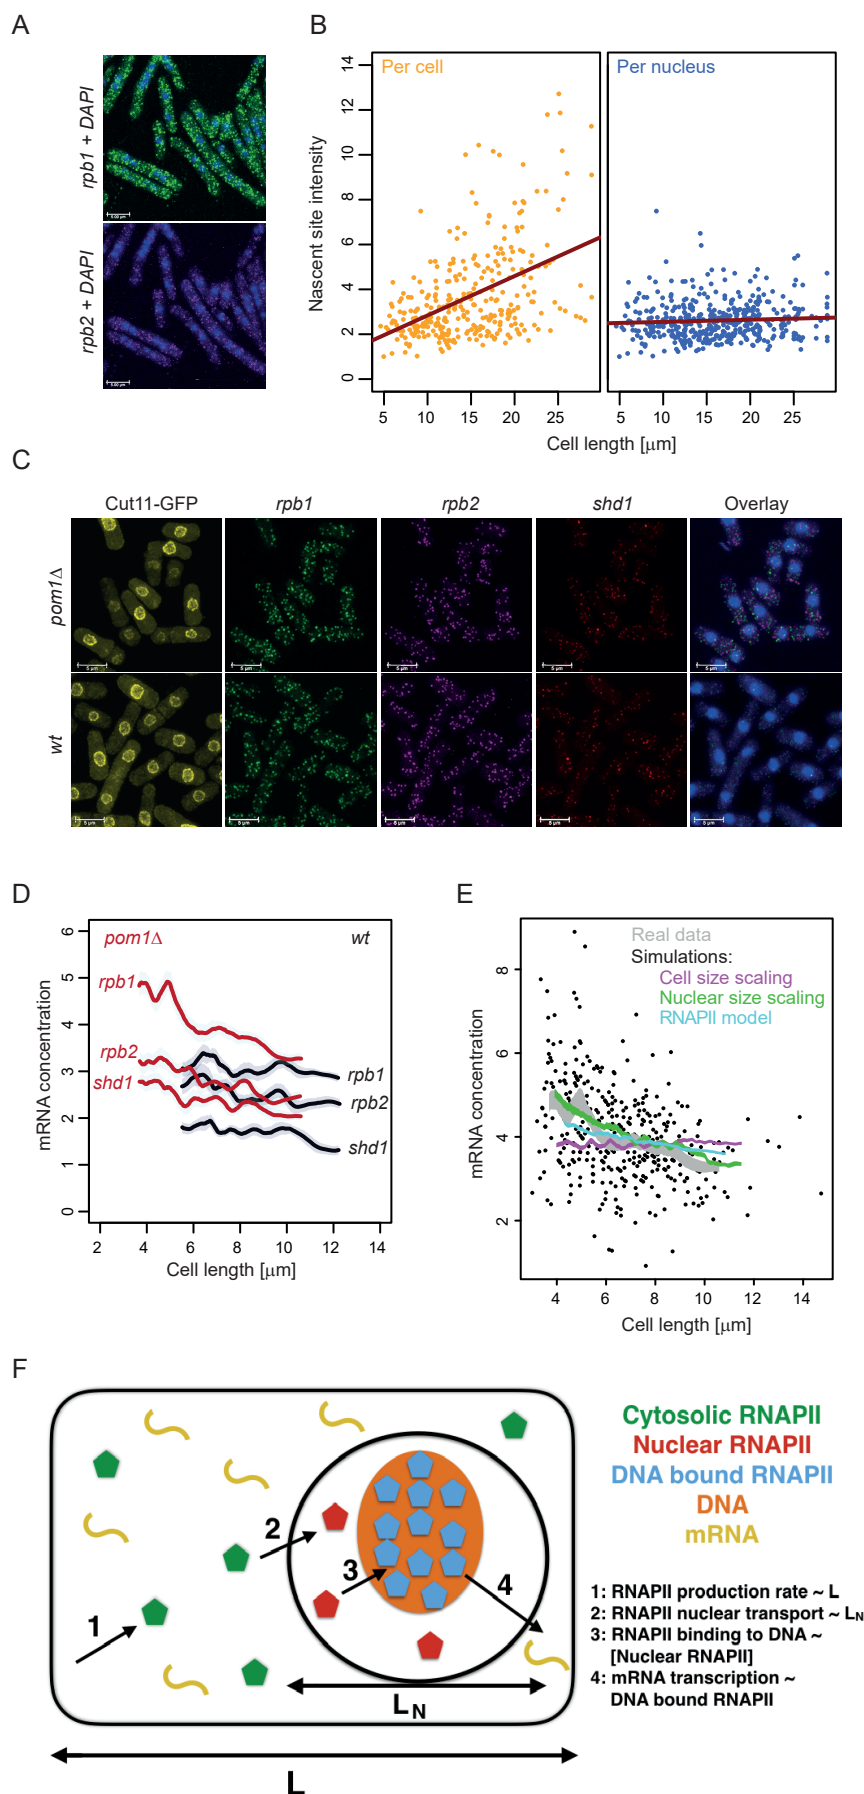



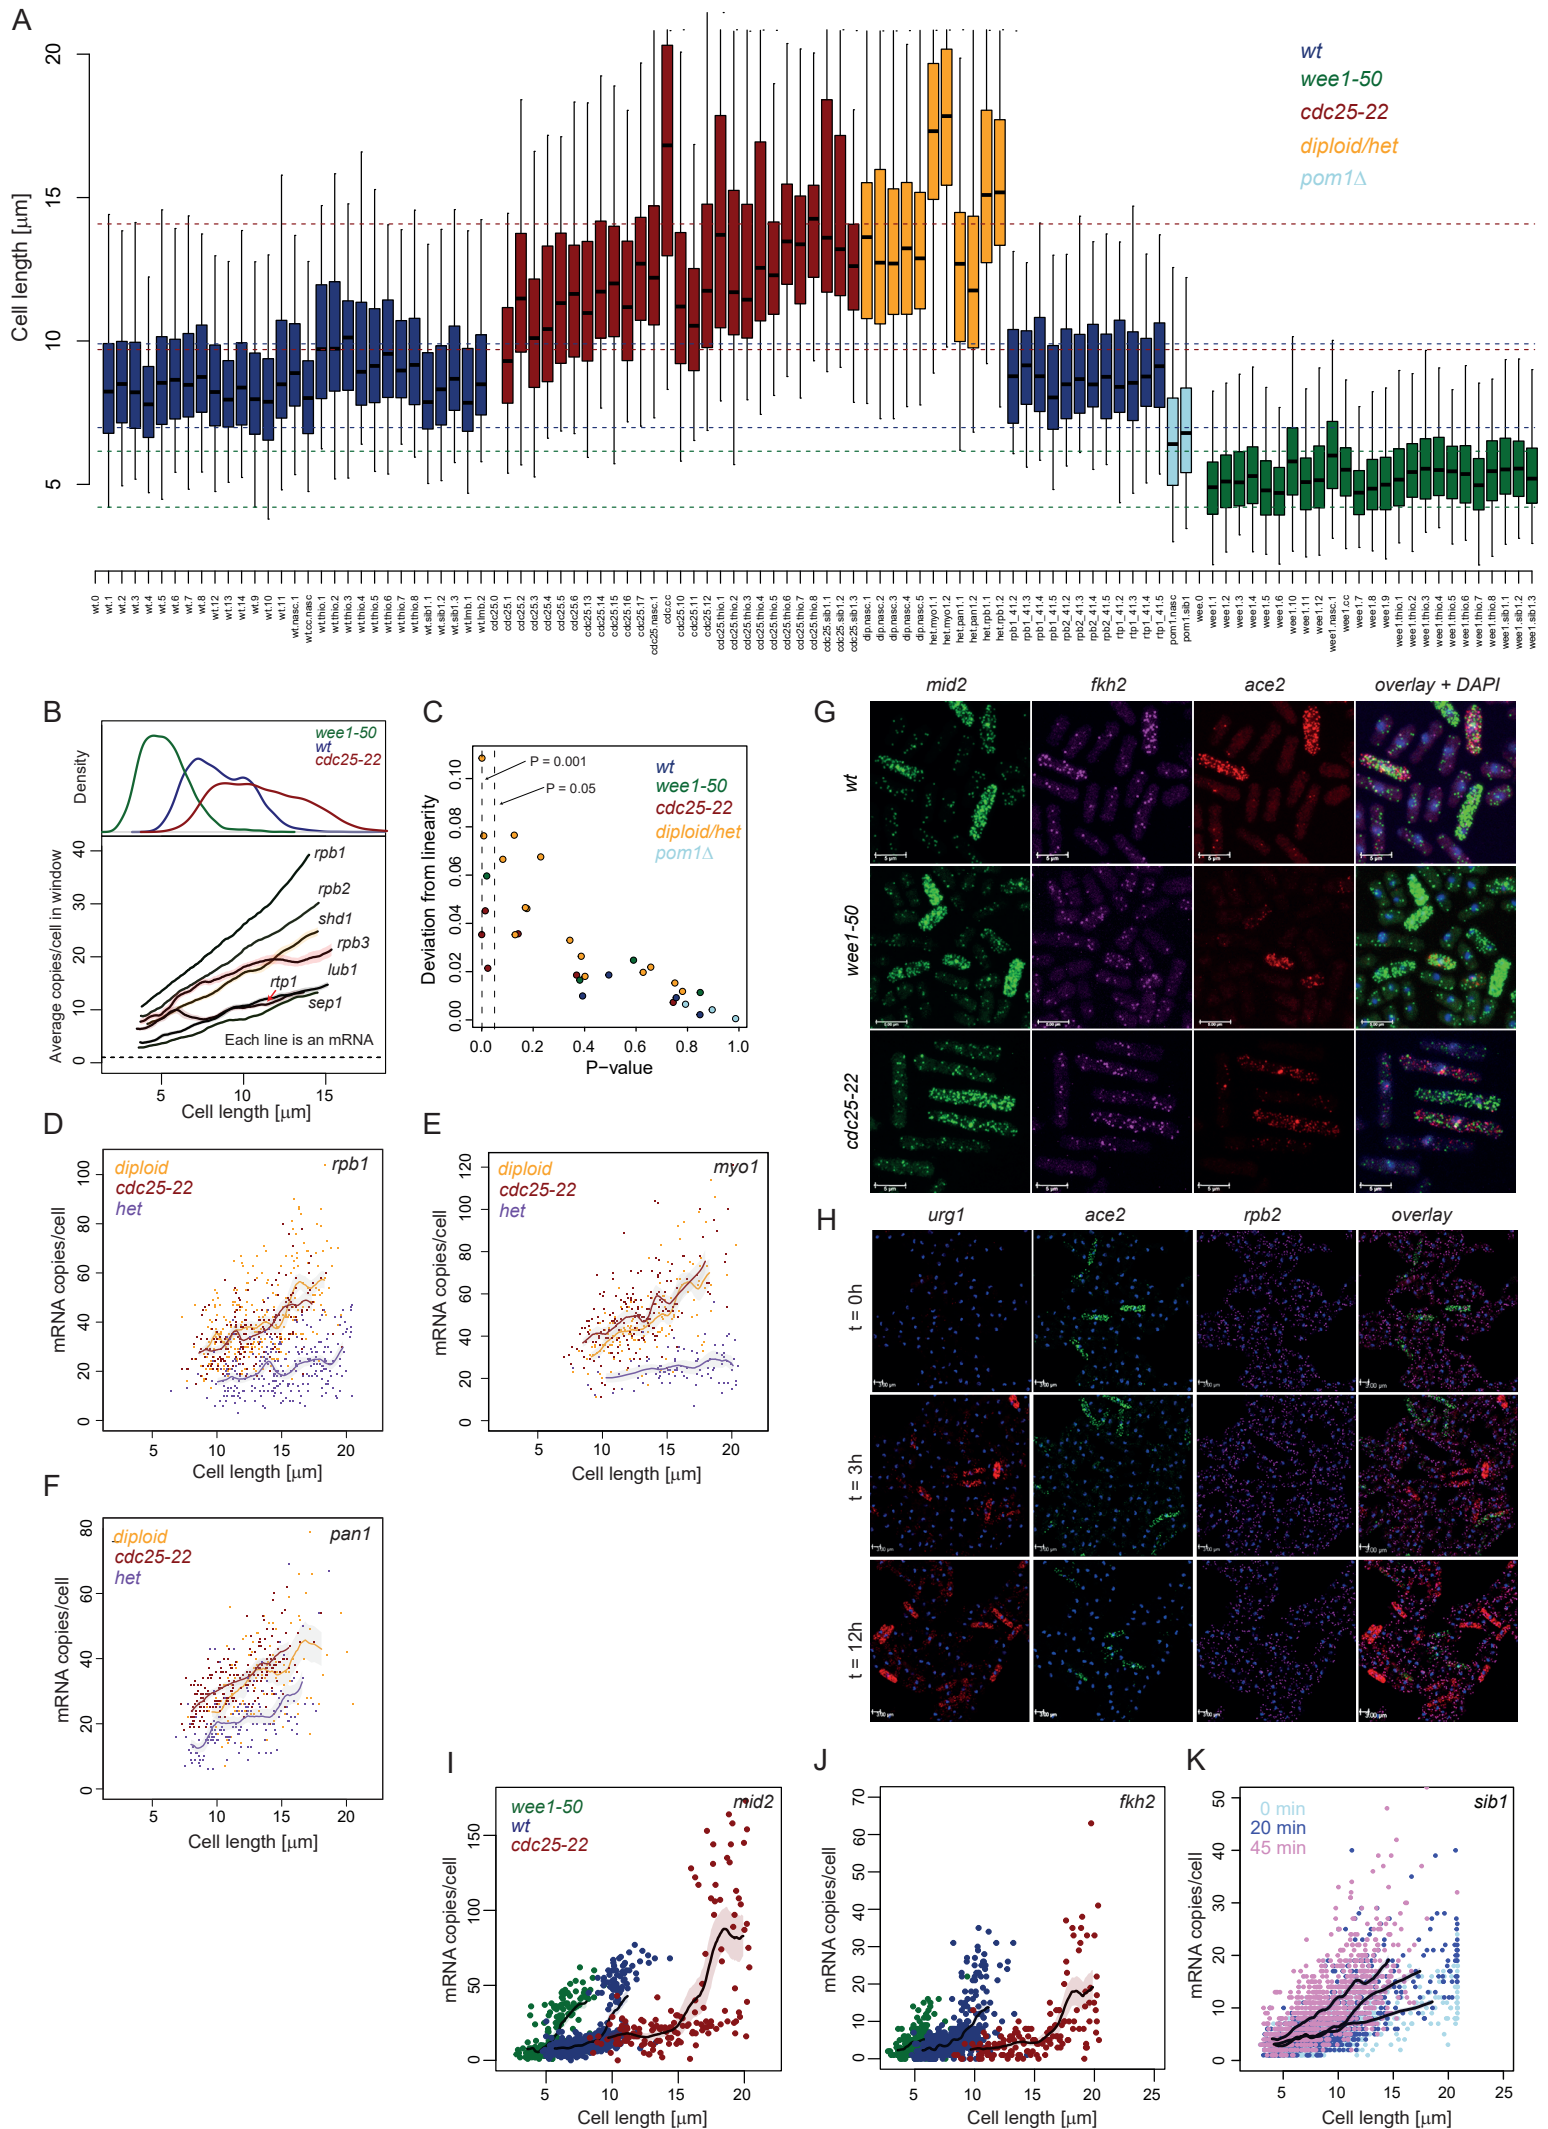



A

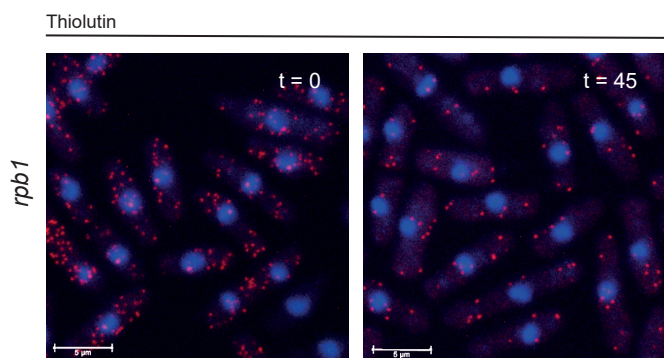

B

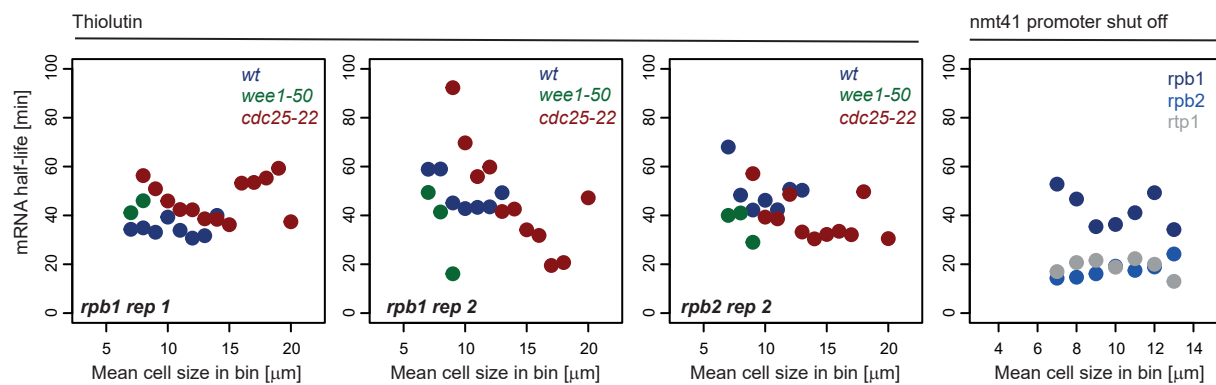

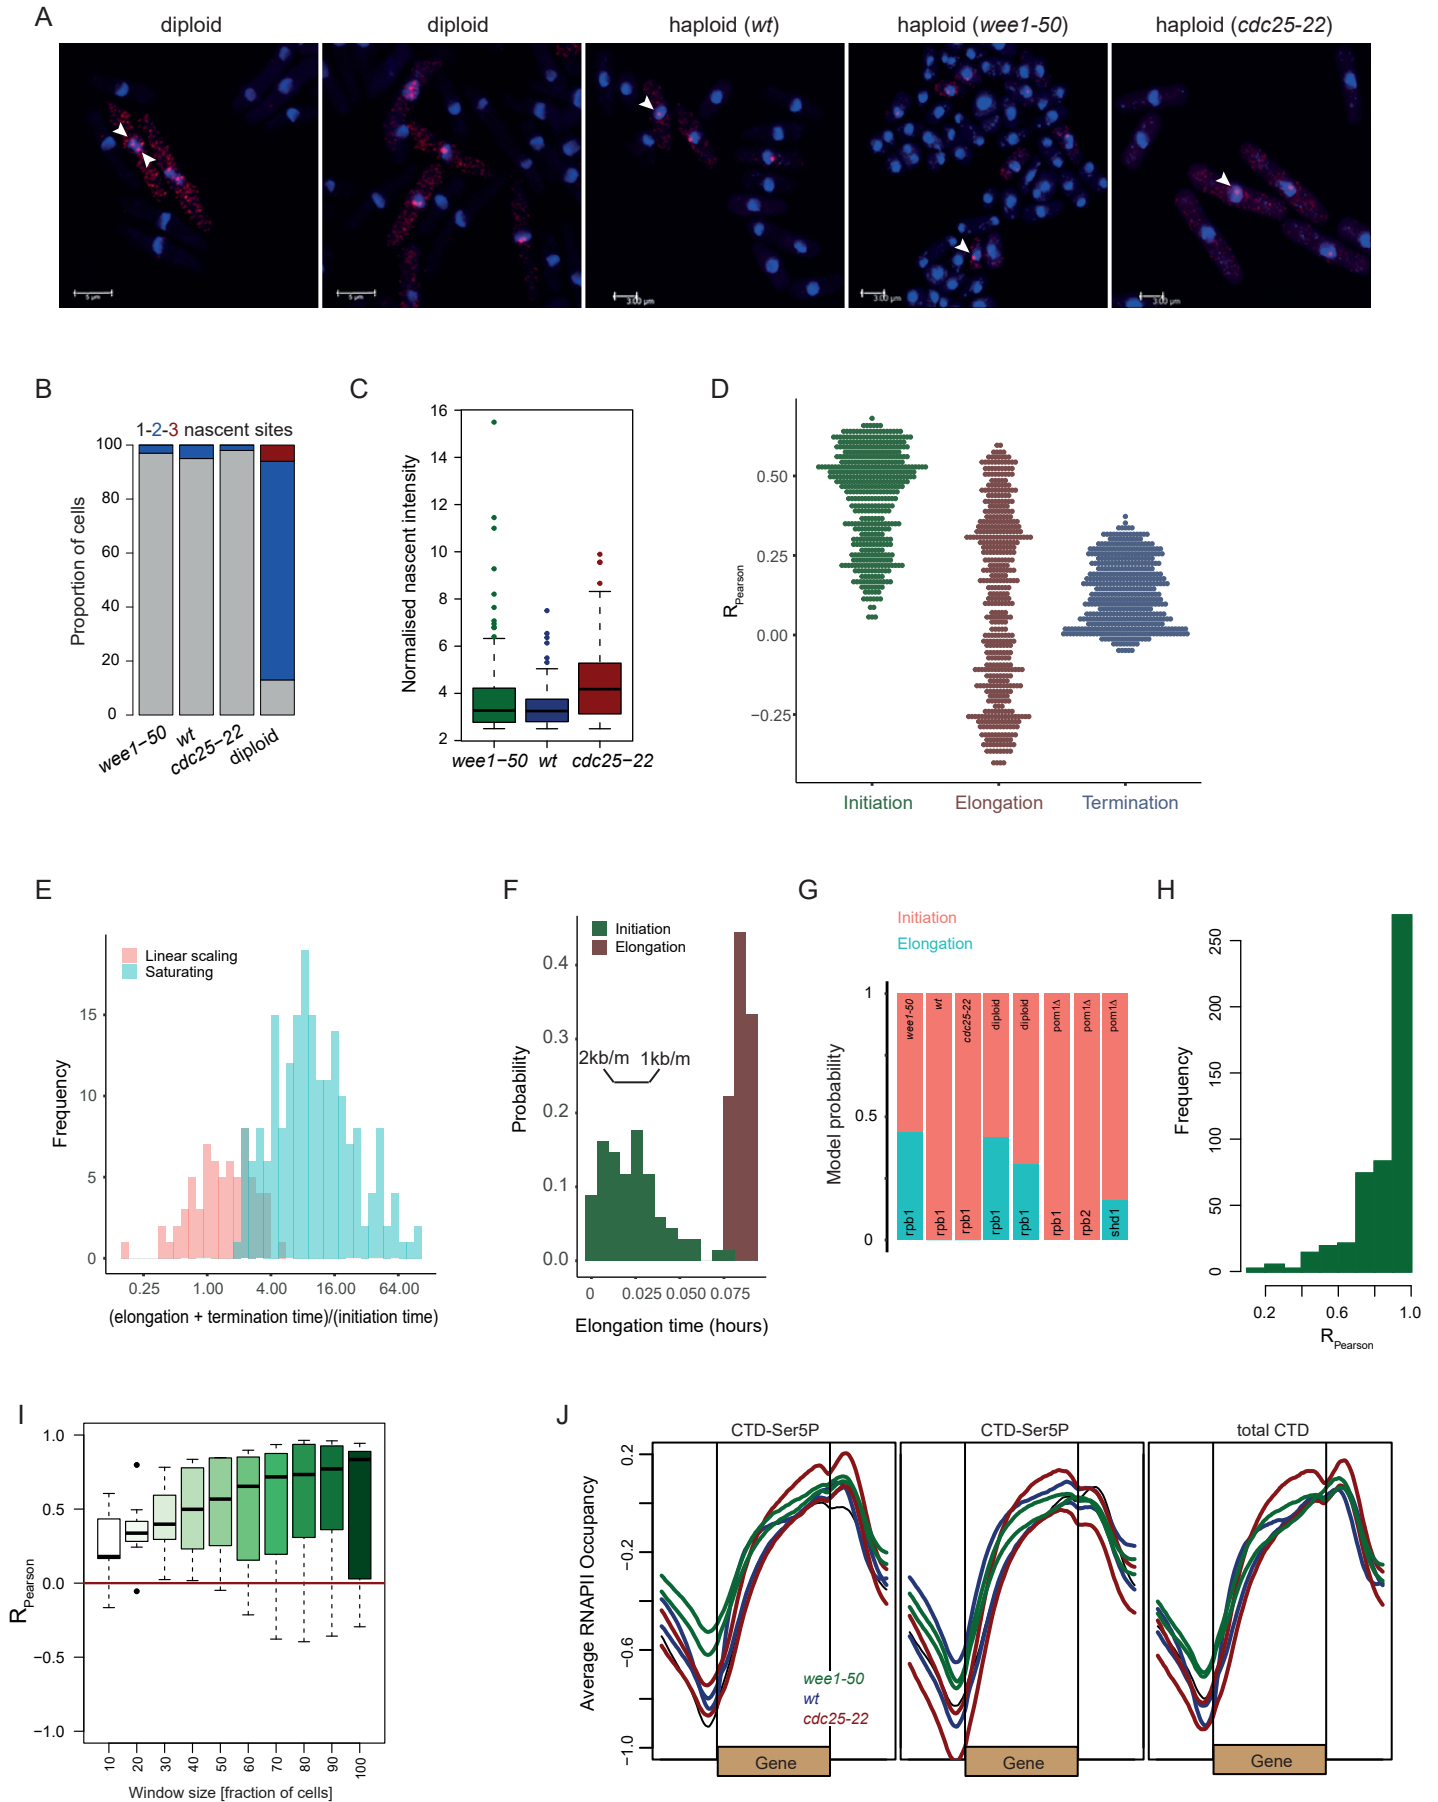

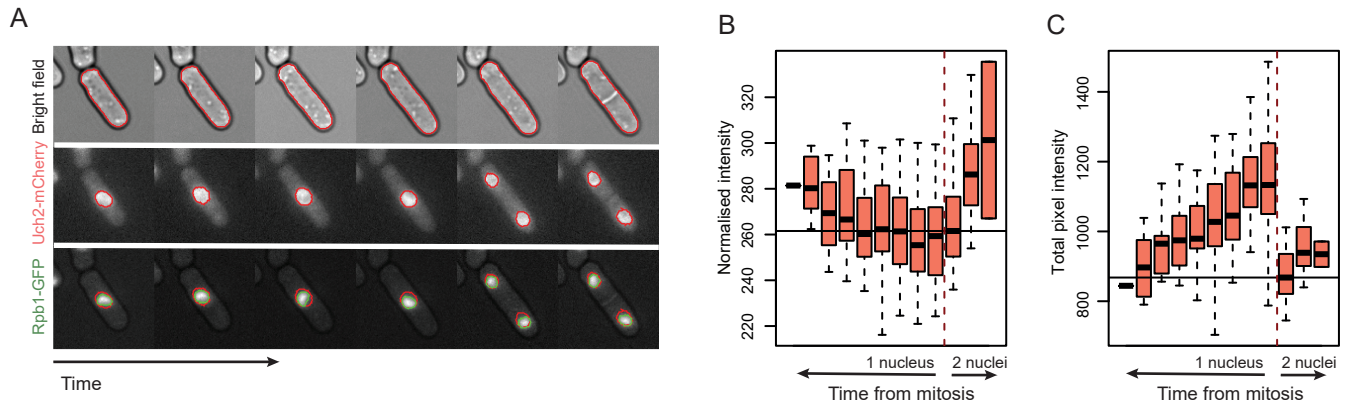

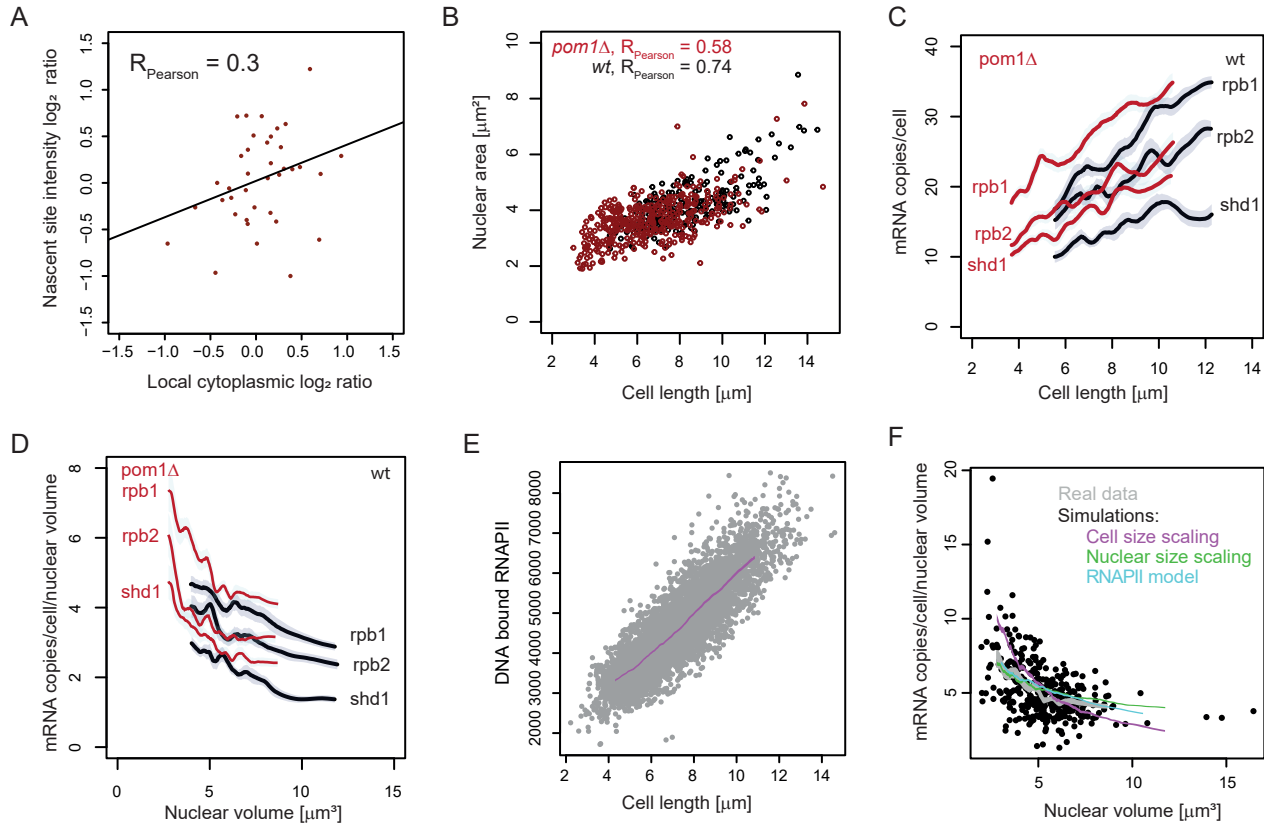

Source: https://www.biorxiv.org/content/10.1101/754788v1.full.pdf
